# Supplementary material for: Vibrational Stark fields in carboxylic acid dimers
Source: Royal Society of Chemistry journal article supplement (doi:10.1039/d1cp02211c), 2022-01-01
Supplement: d1cp02211c1.pdf [file d1cp02211c1.pdf]

**Electronic Supplementary Information for**

**Vibrational Stark Fields in Carboxylic Acid Dimers**

Manjusha Boda and G. Naresh Patwari\*

Department of Chemistry, Indian Institute of Technology Bombay, Powai Mumbai 400076, India

E-mail: naresh@chem.iitb.ac.in

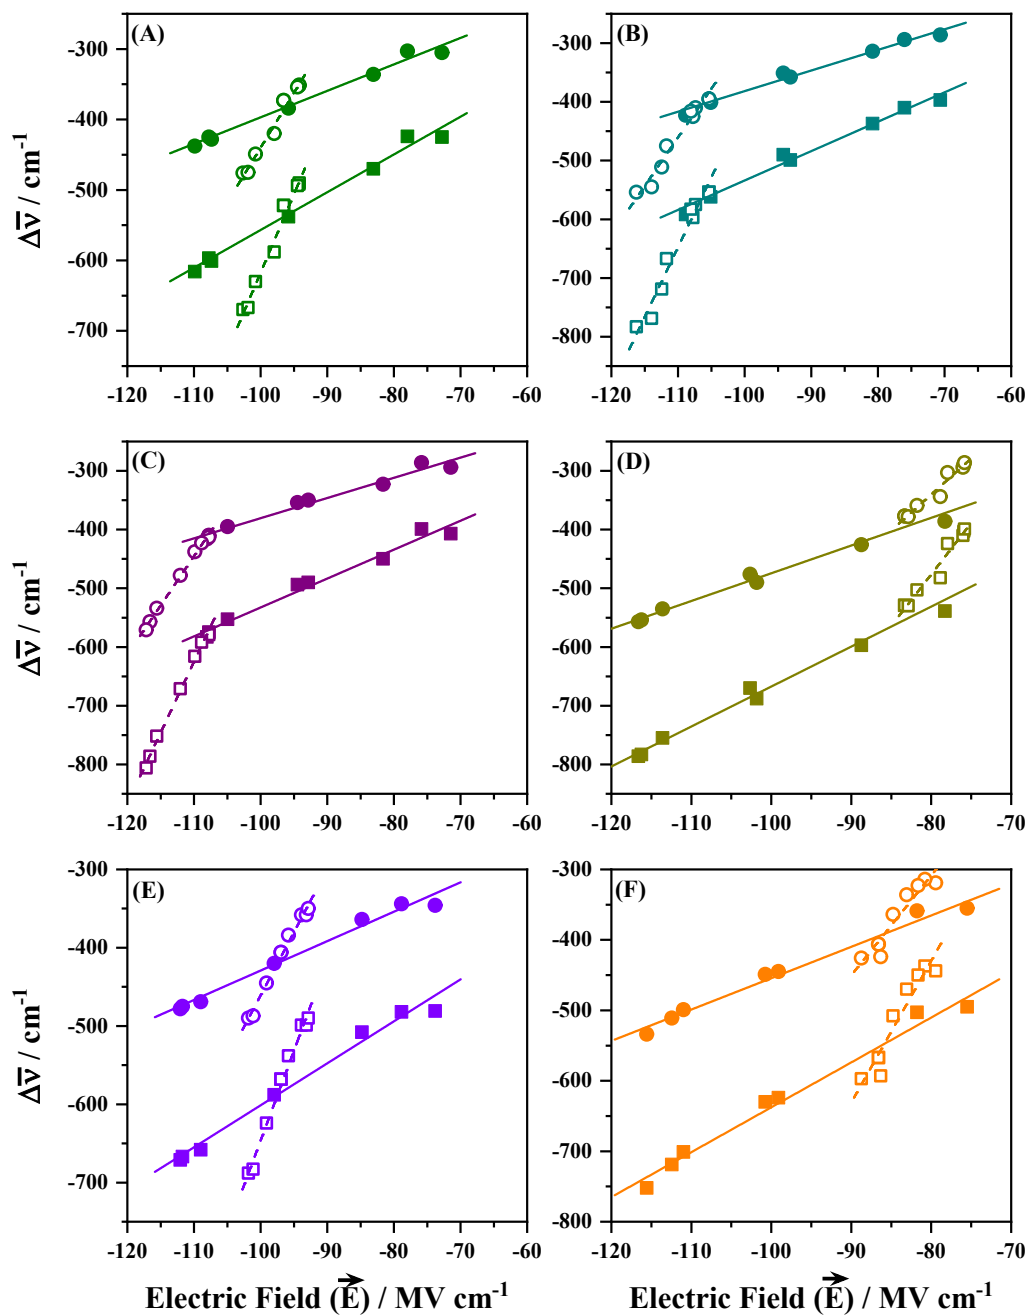

**Fig. S1** Plots of the red-shifts in the O–H (squares) and O–D (circles) stretching frequencies against the corresponding Stark fields in the dimers of (A) formic acid, (B) propanoic acid, (C) methylpropanoic acid, (D) fluoroformic acid, (E) fluoroacetic acid, and (F) difluoroacetic acid calculated at MP2/aug-cc-pVDZ level of theory. The solid symbols represent the shifts in the O–H/O–D stretching frequencies of acetic acid/trifluoroacetic acid due to change in the substituent on the dimerizing partner, while open symbols represent the shifts in the O–H/O–D stretching frequencies of the other carboxylic acids due to their dimerization with acetic acid/trifluoroacetic acid. The straight-lines are linear least-square fits to the data points and the slopes of these straight lines are called Stark tuning rates ( $\Delta\vec{\mu}$ ).

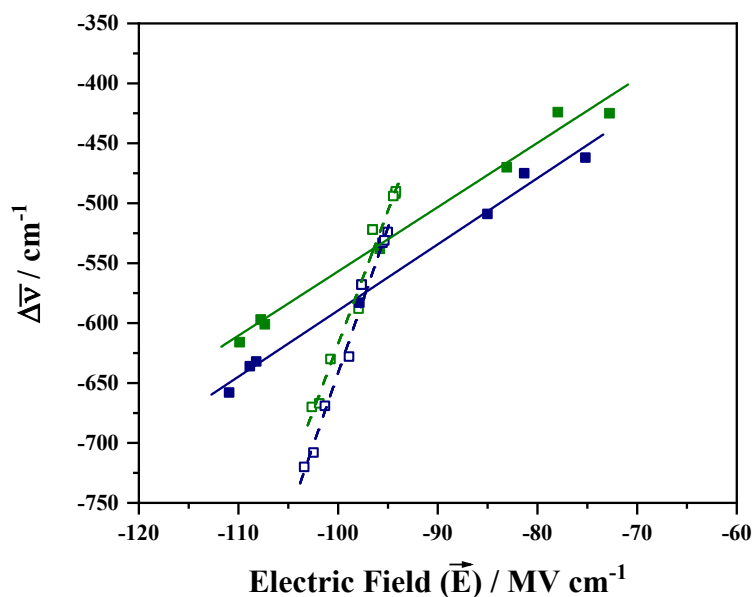

**Fig. S2** Plots of the red-shifts in the harmonic O–H stretching frequencies against the corresponding Stark fields in various formic acid dimers calculated at MP2 level of theory using aug-cc-pVDZ (filled and open green squares) and aug-cc-pVTZ (filled and open blue squares) basis sets. The solid symbols represent the shifts in the O–H stretching frequencies of formic acid dimer due change in the substituent on the dimerizing partner, while open symbols represent the shifts in the O–H stretching frequencies of the other carboxylic acids due to dimerization with formic acid. The straight-lines are linear least-square fits to the data points and the slopes of these straight lines are called Stark tuning rates ( $\Delta\vec{\mu}$ ). The Stark tuning rates ( $\Delta\vec{\mu}$ ) are comparable (5.4 vs 5.5 and 22.3 vs 24.2) and are very weakly dependent on the basis set (aug-cc-pVDZ vs. aug-cc-pVTZ).

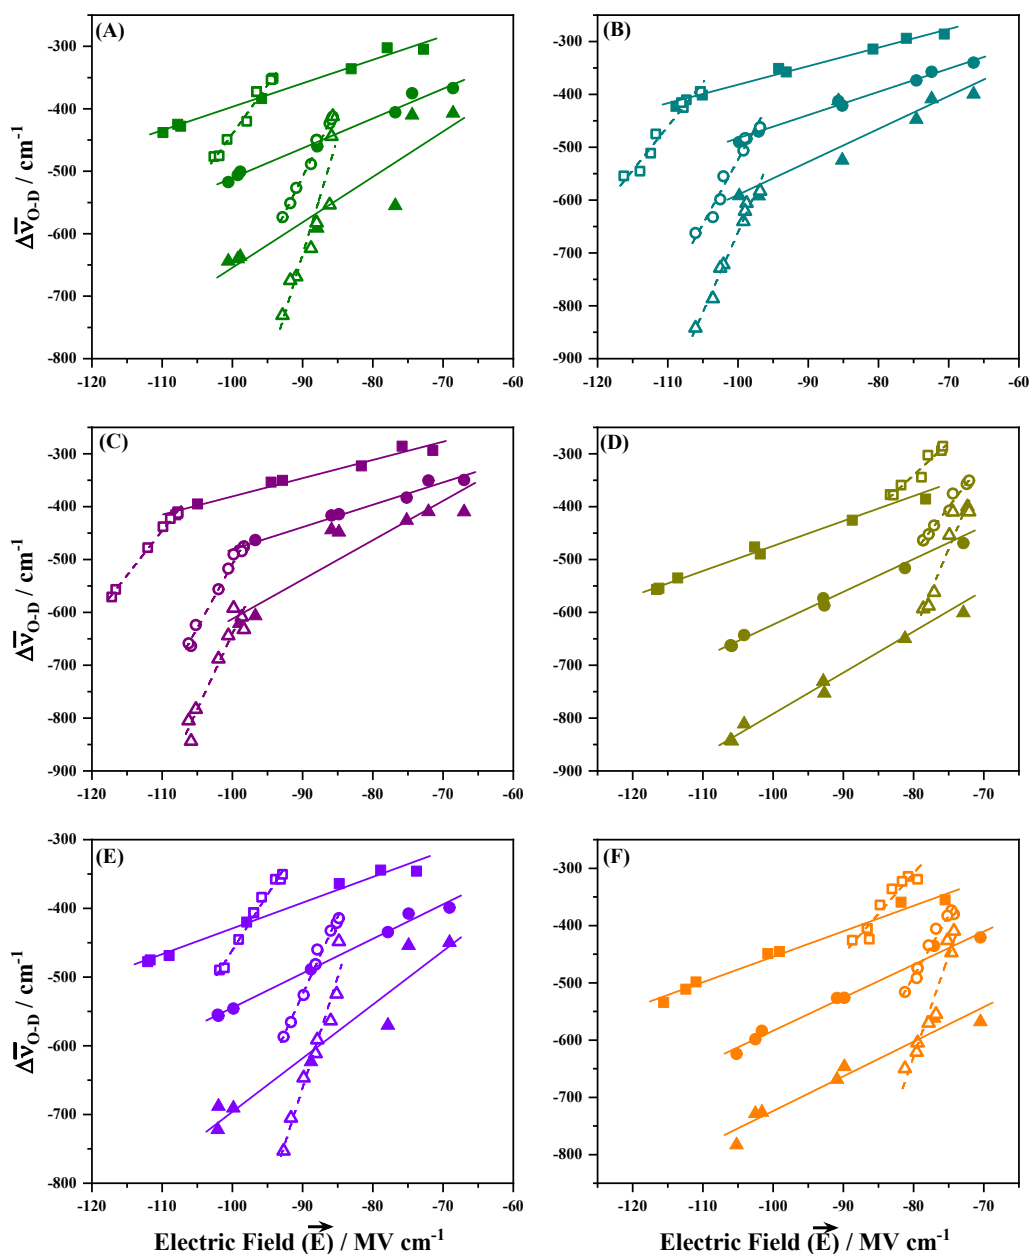

**Fig. S3** Plots of the red-shifts in the O–D stretching frequencies against the corresponding Stark fields in the dimers of (A) formic acid, (B) propanoic acid, (C) methylpropanoic acid, (D) fluoroformic acid, (E) fluoroacetic acid, and (F) difluoroacetic acid. In each case the squares, circles and triangles represent harmonic MP2, harmonic B3LYP-D3, and anharmonic B3LYP-D3 frequency shifts calculated with aug/cc-pVDZ basis set, respectively. . The solid symbols represent the shifts in the O–H/O–D stretching frequencies of acetic acid/trifluoroacetic acid due change in the substituent on the dimerizing partner, while open symbols represent the shifts in the O–H/O–D stretching frequencies of the other carboxylic acids due to their dimerization with acetic acid/trifluoroacetic acid. The straight-lines are linear least-square fits to the data points and the slopes of these straight lines are called Stark tuning rates ( $\Delta\bar{\mu}$ ).

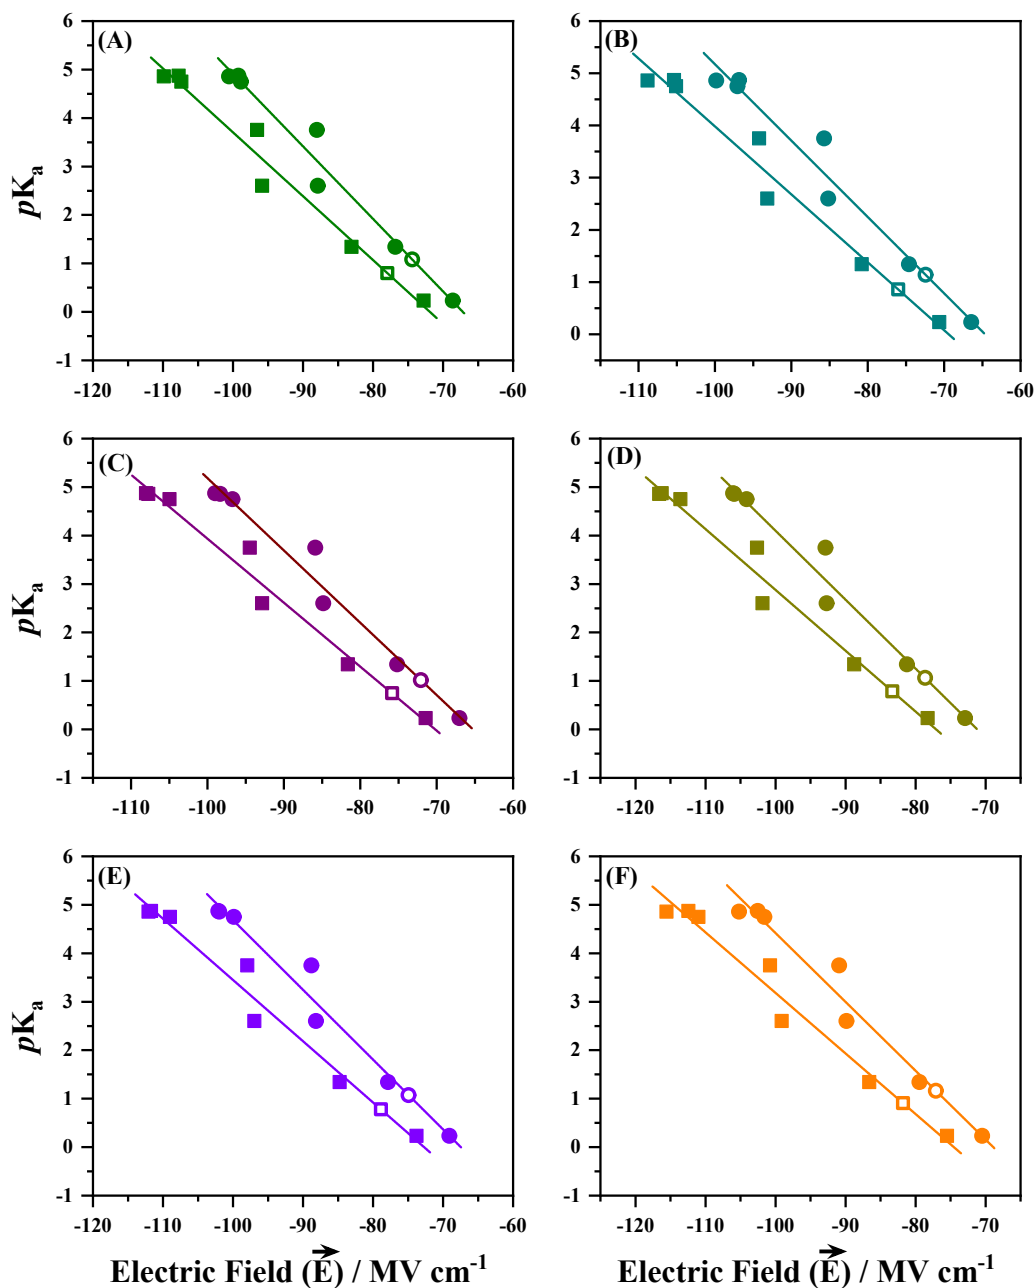

**Fig. S4** Plots of  $pK_a$  of the carboxylic acid against the electric field along the O–H group (A) formic acid, (B) propanoic acid, (C) methylpropanoic acid, (D) fluoroformic acid, (E) fluoroacetic acid, and (F) difluoroacetic acid. In each case the squares, and circles represent the electric field values calculated using MP2 and B3LYP-D3 levels, respectively. The straight-lines are linear least-square fits to the data points. In each case the data point representing open square / open circle is due to fluoroformic acid, whose  $pK_a$  is unknown and is estimated using the linear correlation.

**Table S1.** ZPE corrected dimerization energies (kJ mol<sup>-1</sup>) and total electric field (MV cm<sup>-1</sup>) (*red italics*) for various carboxylic acid dimers calculated at MP2/aug-cc-pVDZ level of theory.

|      | FA                     | AA                     | PA                     | MPA                    | FFA                    | FAA                    | DFAA                   | TFAA                   |
|------|------------------------|------------------------|------------------------|------------------------|------------------------|------------------------|------------------------|------------------------|
| FA   | -60.2<br><i>-193.1</i> | -63.1<br><i>-201.6</i> | -63.3<br><i>-202.0</i> | -64.4<br><i>-204.4</i> | -65.1<br><i>-180.6</i> | -62.1<br><i>-193.8</i> | -63.5<br><i>-183.8</i> | -62.9<br><i>-174.7</i> |
| AA   |                        | -65.4<br><i>-209.9</i> | -62.4<br><i>-212.4</i> | -66.6<br><i>-212.7</i> | -69.7<br><i>-189.5</i> | -65.4<br><i>-202.9</i> | -68.3<br><i>-190.4</i> | -67.8<br><i>-183.8</i> |
| PA   |                        |                        | -65.8<br><i>-210.7</i> | -62.1<br><i>-216.0</i> | -67.1<br><i>-192.3</i> | -64.3<br><i>-204.8</i> | -68.0<br><i>-193.2</i> | -68.4<br><i>-184.6</i> |
| MPA  |                        |                        |                        | -68.0<br><i>-215.5</i> | -71.5<br><i>-192.5</i> | -68.6<br><i>-204.9</i> | -67.7<br><i>-197.2</i> | -68.0<br><i>-188.6</i> |
| FFA  |                        |                        |                        |                        | -66.2<br><i>-166.6</i> | -66.8<br><i>-180.7</i> | -66.3<br><i>-170.5</i> | -64.4<br><i>-161.1</i> |
| FAA  |                        |                        |                        |                        |                        | -67.8<br><i>-193.9</i> | -67.1<br><i>-183.9</i> | -64.7<br><i>-174.9</i> |
| DFAA |                        |                        |                        |                        |                        |                        | -65.4<br><i>-173.2</i> | -64.7<br><i>-161.8</i> |
| TFAA |                        |                        |                        |                        |                        |                        |                        | -62.1<br><i>-154.9</i> |

**Table S2.** ZPE corrected dimerization energies (kJ mol<sup>-1</sup>) and total electric field (MV cm<sup>-1</sup>) (*in italics*) for various carboxylic acid dimers calculated at B3LYP-D3/aug-cc-pVDZ level of theory.

|      | FA                     | AA                     | PA                     | MPA                    | FFA                    | FAA                    | DFAA                   | TFAA                   |
|------|------------------------|------------------------|------------------------|------------------------|------------------------|------------------------|------------------------|------------------------|
| FA   | -58.9<br><i>-176.0</i> | -61.6<br><i>-185.0</i> | -61.4<br><i>-184.9</i> | -62.2<br><i>-186.4</i> | -64.5<br><i>-167.2</i> | -61.1<br><i>-176.7</i> | -61.7<br><i>-167.7</i> | -60.9<br><i>-160.3</i> |
| AA   |                        | -63.1<br><i>-194.0</i> | -59.1<br><i>-195.8</i> | -64.0<br><i>-195.4</i> | -69.1<br><i>-176.4</i> | -64.1<br><i>-185.9</i> | -66.4<br><i>-175.8</i> | -65.5<br><i>-170.0</i> |
| PA   |                        |                        | -63.2<br><i>-193.7</i> | -58.2<br><i>-198.8</i> | -64.9<br><i>-178.5</i> | -61.1<br><i>-187.2</i> | -65.7<br><i>-177.1</i> | -65.9<br><i>-170.0</i> |
| MPA  |                        |                        |                        | -64.8<br><i>-196.7</i> | -70.0<br><i>-177.9</i> | -66.0<br><i>-186.8</i> | -65.0<br><i>-180.4</i> | -65.3<br><i>-173.2</i> |
| FFA  |                        |                        |                        |                        | -65.6<br><i>-157.3</i> | -66.5<br><i>-167.6</i> | -65.0<br><i>-158.3</i> | -62.8<br><i>-150.8</i> |
| FAA  |                        |                        |                        |                        |                        | -65.9<br><i>-176.3</i> | -65.1<br><i>-167.7</i> | -63.0<br><i>-160.7</i> |
| DFAA |                        |                        |                        |                        |                        |                        | -63.2<br><i>-158.8</i> | -62.2<br><i>-150.0</i> |
| TFAA |                        |                        |                        |                        |                        |                        |                        | -59.4<br><i>-143.6</i> |

**Table S3.** Harmonic frequencies ( $\text{cm}^{-1}$ ) of the O–H stretching vibration and their shifts ( $\text{cm}^{-1}$ ) calculated at MP2/aug-cc-pVDZ level for various carboxylic acid dimer and the corresponding electric field along the O–H bond ( $\text{MV cm}^{-1}$ ). For each set of carboxylic acid dimer two cases **R** and **R'** arise, (i) frequency shift in a particular carboxylic acid (**R**) when the interaction partner is changed (**R'**), (ii) frequency shifts of the partners (**R'**) when paired with a particular carboxylic acid (**R**). The  $pK_a$  values of the varying partner (**R'**) are also listed.

| Dimer           | $\nu_{\text{O-H}}$ | $\Delta\nu_{\text{O-H}}$ | Field   | $\nu_{\text{O-H}}$ | $\Delta\nu_{\text{O-H}}$ | Field   | $pK_a$ ( <b>R'</b> ) |
|-----------------|--------------------|--------------------------|---------|--------------------|--------------------------|---------|----------------------|
|                 | <b>R</b>           |                          |         | <b>R'</b>          |                          |         |                      |
| <b>FA-FA</b>    | 3202               | -522                     | -96.54  | 3202               | -522                     | -96.54  | 3.75                 |
| <b>FA-AA</b>    | 3124               | -601                     | -107.36 | 3250               | -492                     | -94.24  | 4.75                 |
| <b>FA-PA</b>    | 3128               | -597                     | -107.77 | 3248               | -490                     | -94.20  | 4.87                 |
| <b>FA-MPA</b>   | 3109               | -616                     | -109.88 | 3236               | -494                     | -94.46  | 4.86                 |
| <b>FA-FFA</b>   | 3301               | -424                     | -77.95  | 3108               | -670                     | -102.64 | -                    |
| <b>FA-FAA</b>   | 3187               | -538                     | -95.82  | 3156               | -588                     | -97.95  | 2.60                 |
| <b>FA-DFAA</b>  | 3255               | -470                     | -83.07  | 3108               | -630                     | -100.76 | 1.34                 |
| <b>FA-TFAA</b>  | 3300               | -425                     | -72.77  | 3070               | -667                     | -101.88 | 0.23                 |
|                 | <b>R</b>           |                          |         | <b>R'</b>          |                          |         |                      |
| <b>AA-AA</b>    | 3184               | -558                     | -104.95 | 3184               | -558                     | -104.95 | 4.75                 |
| <b>AA-FA</b>    | 3250               | -492                     | -94.24  | 3124               | -601                     | -107.36 | 3.75                 |
| <b>AA-PA</b>    | 3166               | -575                     | -107.35 | 3177               | -562                     | -105.09 | 4.87                 |
| <b>AA-MPA</b>   | 3162               | -579                     | -107.76 | 3177               | -553                     | -104.96 | 4.86                 |
| <b>AA-FFA</b>   | 3338               | -403                     | -75.91  | 3023               | -755                     | -113.58 | -                    |
| <b>AA-FAA</b>   | 3242               | -499                     | -93.86  | 3086               | -658                     | -108.99 | 2.60                 |
| <b>AA-DFAA</b>  | 3297               | -444                     | -79.42  | 3037               | -701                     | -110.98 | 1.34                 |
| <b>AA-TFAA</b>  | 3337               | -404                     | -70.80  | 2979               | -758                     | -112.97 | 0.23                 |
|                 | <b>R</b>           |                          |         | <b>R'</b>          |                          |         |                      |
| <b>PA-PA</b>    | 3185               | -554                     | -105.35 | 3185               | -554                     | -105.35 | 4.87                 |
| <b>PA-FA</b>    | 3248               | -490                     | -94.20  | 3128               | -597                     | -107.77 | 3.75                 |
| <b>PA-AA</b>    | 3177               | -562                     | -105.09 | 3166               | -575                     | -107.35 | 4.75                 |
| <b>PA-MPA</b>   | 3147               | -592                     | -108.83 | 3147               | -583                     | -108.04 | 4.86                 |
| <b>PA-FFA</b>   | 3329               | -410                     | -76.02  | 2995               | -783                     | -116.24 | -                    |
| <b>PA-FAA</b>   | 3239               | -499                     | -93.13  | 3077               | -667                     | -111.71 | 2.60                 |
| <b>PA-DFAA</b>  | 3302               | -437                     | -80.78  | 3019               | -719                     | -112.43 | 1.34                 |
| <b>PA-TFAA</b>  | 3342               | -397                     | -70.62  | 2968               | -769                     | -113.96 | 0.23                 |
|                 | <b>R</b>           |                          |         | <b>R'</b>          |                          |         |                      |
| <b>MPA-MPA</b>  | 3155               | -575                     | -107.74 | 3155               | -575                     | -107.74 | 4.86                 |
| <b>MPA-FA</b>   | 3236               | -494                     | -94.46  | 3109               | -616                     | -109.88 | 3.75                 |
| <b>MPA-AA</b>   | 3177               | -553                     | -104.96 | 3162               | -579                     | -107.76 | 4.75                 |
| <b>MPA-PA</b>   | 3147               | -583                     | -108.04 | 3147               | -592                     | -108.83 | 4.87                 |
| <b>MPA-FFA</b>  | 3332               | -399                     | -75.84  | 2992               | -786                     | -116.61 | -                    |
| <b>MPA-FAA</b>  | 3241               | -490                     | -92.84  | 3073               | -671                     | -112.05 | 2.60                 |
| <b>MPA-DFAA</b> | 3281               | -450                     | -81.62  | 2986               | -752                     | -115.57 | 1.34                 |
| <b>MPA-TFAA</b> | 3323               | -407                     | -71.44  | 2931               | -806                     | -117.17 | 0.23                 |

|                  | <b>R</b> |      |         | <b>R'</b> |      |         |      |
|------------------|----------|------|---------|-----------|------|---------|------|
| <b>FFA-FFA</b>   | 3248     | -529 | -83.31  | 3248      | -529 | -83.31  | -    |
| <b>FFA-FA</b>    | 3108     | -670 | -102.64 | 3301      | -424 | -77.95  | 3.75 |
| <b>FFA-AA</b>    | 3023     | -755 | -113.58 | 3338      | -403 | -75.91  | 4.75 |
| <b>FFA-PA</b>    | 2995     | -783 | -116.24 | 3329      | -410 | -76.02  | 4.87 |
| <b>FFA-MPA</b>   | 2992     | -786 | -116.61 | 3332      | -399 | -75.84  | 4.86 |
| <b>FFA-FAA</b>   | 3090     | -688 | -101.83 | 3262      | -482 | -78.86  | 2.60 |
| <b>FFA-DFAA</b>  | 3181     | -597 | -88.73  | 3234      | -503 | -81.78  | 1.34 |
| <b>FFA-TFAA</b>  | 3239     | -539 | -78.27  | 3207      | -530 | -82.87  | 0.23 |
|                  | <b>R</b> |      |         | <b>R'</b> |      |         |      |
| <b>FAA-FAA</b>   | 3175     | -568 | -96.94  | 3175      | -568 | -96.94  | 2.60 |
| <b>FAA-FA</b>    | 3156     | -588 | -97.95  | 3187      | -538 | -95.82  | 3.75 |
| <b>FAA-AA</b>    | 3086     | -658 | -108.99 | 3242      | -499 | -93.86  | 4.75 |
| <b>FAA-PA</b>    | 3077     | -667 | -111.71 | 3239      | -499 | -93.13  | 4.87 |
| <b>FAA-MPA</b>   | 3073     | -671 | -112.05 | 3241      | -490 | -92.84  | 4.86 |
| <b>FAA-FFA</b>   | 3262     | -482 | -78.86  | 3090      | -688 | -101.83 | -    |
| <b>FAA-DFAA</b>  | 3236     | -508 | -84.77  | 3114      | -624 | -99.11  | 1.34 |
| <b>FAA-TFAA</b>  | 3263     | -481 | -73.78  | 3054      | -683 | -101.13 | 0.23 |
|                  | <b>R</b> |      |         | <b>R'</b> |      |         |      |
| <b>DFAA-DFAA</b> | 3171     | -567 | -86.59  | 3171      | -567 | -86.59  | 1.34 |
| <b>DFAA-FA</b>   | 3108     | -630 | -100.76 | 3255      | -470 | -83.07  | 3.75 |
| <b>DFAA-AA</b>   | 3037     | -701 | -110.98 | 3297      | -444 | -79.42  | 4.75 |
| <b>DFAA-PA</b>   | 3019     | -719 | -112.43 | 3302      | -437 | -80.78  | 4.87 |
| <b>DFAA-MPA</b>  | 2986     | -752 | -115.57 | 3281      | -450 | -81.62  | 4.86 |
| <b>DFAA-FFA</b>  | 3234     | -503 | -81.78  | 3181      | -597 | -88.73  | -    |
| <b>DFAA-FAA</b>  | 3114     | -624 | -99.11  | 3236      | -508 | -84.77  | 2.60 |
| <b>DFAA-TFAA</b> | 3243     | -495 | -75.50  | 3144      | -593 | -86.30  | 0.23 |
|                  | <b>R</b> |      |         | <b>R'</b> |      |         |      |
| <b>TFAA-TFAA</b> | 3204     | -534 | -77.44  | 3204      | -534 | -77.44  | 0.23 |
| <b>TFAA-FA</b>   | 3070     | -667 | -101.88 | 3300      | -425 | -72.77  | 3.75 |
| <b>TFAA-AA</b>   | 2979     | -758 | -112.97 | 3337      | -404 | -70.80  | 4.75 |
| <b>TFAA-PA</b>   | 2968     | -769 | -113.96 | 3342      | -397 | -70.62  | 4.87 |
| <b>TFAA-MPA</b>  | 2931     | -806 | -117.17 | 3323      | -407 | -71.44  | 4.86 |
| <b>TFAA-FFA</b>  | 3207     | -530 | -82.87  | 3239      | -539 | -78.27  | -    |
| <b>TFAA-FAA</b>  | 3054     | -683 | -101.13 | 3263      | -481 | -73.78  | 2.60 |
| <b>TFAA-DFAA</b> | 3144     | -593 | -86.30  | 3243      | -495 | -75.50  | 1.34 |



**Table S4.** Harmonic frequencies ( $\text{cm}^{-1}$ ) of the O–D stretching vibration and their shifts ( $\text{cm}^{-1}$ ) calculated at MP2/aug-cc-pVDZ level for various carboxylic acid dimer and the corresponding electric field along the O–D bond ( $\text{MV cm}^{-1}$ ). For each set of carboxylic acid dimer two cases arise, (i) frequency shift in a particular carboxylic acid (R) when the interaction partner is changed (R'), (ii) frequency shifts of the partners (R') when paired with a particular carboxylic acid (R). The  $pK_a$  values of the varying partner (R') are also listed.

| Dimer           | $\nu_{\text{O-D}}$ | $\Delta\nu_{\text{O-D}}$ | Field   | $\nu_{\text{O-D}}$ | $\Delta\nu_{\text{O-D}}$ | Field   | $pK_a$ (R') |
|-----------------|--------------------|--------------------------|---------|--------------------|--------------------------|---------|-------------|
|                 | <b>R</b>           |                          |         | <b>R'</b>          |                          |         |             |
| <b>FA-FA</b>    | 2336               | -373                     | -96.54  | 2336               | -373                     | -96.54  | 3.75        |
| <b>FA-AA</b>    | 2281               | -428                     | -107.36 | 2370               | -352                     | -94.24  | 4.75        |
| <b>FA-PA</b>    | 2284               | -425                     | -107.77 | 2369               | -351                     | -94.20  | 4.87        |
| <b>FA-MPA</b>   | 2271               | -438                     | -109.88 | 2360               | -354                     | -94.46  | 4.86        |
| <b>FA-FFA</b>   | 2406               | -303                     | -77.95  | 2273               | -476                     | -102.64 |             |
| <b>FA-FAA</b>   | 2325               | -384                     | -95.82  | 2303               | -420                     | -97.95  | 2.60        |
| <b>FA-DFAA</b>  | 2373               | -336                     | -83.07  | 2270               | -449                     | -100.76 | 1.34        |
| <b>FA-TFAA</b>  | 2404               | -305                     | -72.77  | 2244               | -475                     | -101.88 | 0.23        |
|                 | <b>R</b>           |                          |         | <b>R'</b>          |                          |         |             |
| <b>AA-AA</b>    | 2323               | -398                     | -104.95 | 2323               | -398                     | -104.95 | 4.75        |
| <b>AA-FA</b>    | 2370               | -352                     | -94.24  | 2281               | -428                     | -107.36 | 3.75        |
| <b>AA-PA</b>    | 2311               | -410                     | -107.35 | 2318               | -401                     | -105.09 | 4.87        |
| <b>AA-MPA</b>   | 2309               | -413                     | -107.76 | 2318               | -395                     | -104.96 | 4.86        |
| <b>AA-FFA</b>   | 2432               | -289                     | -75.91  | 2214               | -535                     | -113.58 |             |
| <b>AA-FAA</b>   | 2364               | -358                     | -93.86  | 2255               | -469                     | -108.99 | 2.60        |
| <b>AA-DFAA</b>  | 2402               | -319                     | -79.42  | 2221               | -499                     | -110.98 | 1.34        |
| <b>AA-TFAA</b>  | 2431               | -291                     | -70.80  | 2181               | -538                     | -112.97 | 0.23        |
|                 | <b>R</b>           |                          |         | <b>R'</b>          |                          |         |             |
| <b>PA-PA</b>    | 2325               | -395                     | -105.35 | 2325               | -395                     | -105.35 | 4.87        |
| <b>PA-FA</b>    | 2369               | -351                     | -94.20  | 2284               | -425                     | -107.77 | 3.75        |
| <b>PA-AA</b>    | 2318               | -401                     | -105.09 | 2311               | -410                     | -107.35 | 4.75        |
| <b>PA-MPA</b>   | 2297               | -423                     | -108.83 | 2298               | -416                     | -108.04 | 4.86        |
| <b>PA-FFA</b>   | 2426               | -294                     | -76.02  | 2195               | -554                     | -116.24 |             |
| <b>PA-FAA</b>   | 2362               | -358                     | -93.13  | 2248               | -475                     | -111.71 | 2.60        |
| <b>PA-DFAA</b>  | 2405               | -314                     | -80.78  | 2208               | -511                     | -112.43 | 1.34        |
| <b>PA-TFAA</b>  | 2434               | -286                     | -70.62  | 2174               | -545                     | -113.96 | 0.23        |
|                 | <b>R</b>           |                          |         | <b>R'</b>          |                          |         |             |
| <b>MPA-MPA</b>  | 2303               | -410                     | -107.74 | 2303               | -410                     | -107.74 | 4.86        |
| <b>MPA-FA</b>   | 2360               | -354                     | -94.46  | 2271               | -438                     | -109.88 | 3.75        |
| <b>MPA-AA</b>   | 2318               | -395                     | -104.96 | 2309               | -413                     | -107.76 | 4.75        |
| <b>MPA-PA</b>   | 2298               | -416                     | -108.04 | 2297               | -423                     | -108.83 | 4.87        |
| <b>MPA-FFA</b>  | 2428               | -286                     | -75.84  | 2193               | -557                     | -116.61 |             |
| <b>MPA-FAA</b>  | 2363               | -350                     | -92.84  | 2246               | -478                     | -112.05 | 2.60        |
| <b>MPA-DFAA</b> | 2390               | -323                     | -81.62  | 2185               | -534                     | -115.57 | 1.34        |
| <b>MPA-TFAA</b> | 2420               | -294                     | -71.44  | 2148               | -571                     | -117.17 | 0.23        |

|                  | <b>R</b> |      |         | <b>R'</b> |      |         |      |
|------------------|----------|------|---------|-----------|------|---------|------|
| <b>FFA-FFA</b>   | 2372     | -377 | -83.31  | 2372      | -377 | -83.31  |      |
| <b>FFA-FA</b>    | 2273     | -476 | -102.64 | 2406      | -303 | -77.95  | 3.75 |
| <b>FFA-AA</b>    | 2214     | -535 | -113.58 | 2432      | -289 | -75.91  | 4.75 |
| <b>FFA-PA</b>    | 2195     | -554 | -116.24 | 2426      | -294 | -76.02  | 4.87 |
| <b>FFA-MPA</b>   | 2193     | -557 | -116.61 | 2428      | -286 | -75.84  | 4.86 |
| <b>FFA-FAA</b>   | 2260     | -490 | -101.83 | 2379      | -344 | -78.86  | 2.60 |
| <b>FFA-DFAA</b>  | 2323     | -426 | -88.73  | 2360      | -359 | -81.78  | 1.34 |
| <b>FFA-TFAA</b>  | 2364     | -386 | -78.27  | 2341      | -378 | -82.87  | 0.23 |
|                  | <b>R</b> |      |         | <b>R'</b> |      |         |      |
| <b>FAA-FAA</b>   | 2317     | -406 | -96.94  | 2317      | -406 | -96.94  | 2.60 |
| <b>FAA-FA</b>    | 2303     | -420 | -97.95  | 2325      | -384 | -95.82  | 3.75 |
| <b>FAA-AA</b>    | 2255     | -469 | -108.99 | 2364      | -358 | -93.86  | 4.75 |
| <b>FAA-PA</b>    | 2248     | -475 | -111.71 | 2362      | -358 | -93.13  | 4.87 |
| <b>FAA-MPA</b>   | 2246     | -478 | -112.05 | 2363      | -350 | -92.84  | 4.86 |
| <b>FAA-FFA</b>   | 2379     | -344 | -78.86  | 2260      | -490 | -101.83 |      |
| <b>FAA-DFAA</b>  | 2359     | -364 | -84.77  | 2274      | -445 | -99.11  | 1.34 |
| <b>FAA-TFAA</b>  | 2378     | -346 | -73.78  | 2232      | -487 | -101.13 | 0.23 |
|                  | <b>R</b> |      |         | <b>R'</b> |      |         |      |
| <b>DFAA-DFAA</b> | 2314     | -406 | -86.59  | 2314      | -406 | -86.59  | 1.34 |
| <b>DFAA-FA</b>   | 2270     | -449 | -100.76 | 2373      | -336 | -83.07  | 3.75 |
| <b>DFAA-AA</b>   | 2221     | -499 | -110.98 | 2402      | -319 | -79.42  | 4.75 |
| <b>DFAA-PA</b>   | 2208     | -511 | -112.43 | 2405      | -314 | -80.78  | 4.87 |
| <b>DFAA-MPA</b>  | 2185     | -534 | -115.57 | 2390      | -323 | -81.62  | 4.86 |
| <b>DFAA-FFA</b>  | 2360     | -359 | -81.78  | 2323      | -426 | -88.73  |      |
| <b>DFAA-FAA</b>  | 2274     | -445 | -99.11  | 2359      | -364 | -84.77  | 2.60 |
| <b>DFAA-TFAA</b> | 2364     | -355 | -75.50  | 2295      | -424 | -86.30  | 0.23 |
|                  | <b>R</b> |      |         | <b>R'</b> |      |         |      |
| <b>TFAA-TFAA</b> | 2337     | -382 | -77.44  | 2337      | -382 | -77.44  | 0.23 |
| <b>TFAA-FA</b>   | 2244     | -475 | -101.88 | 2404      | -305 | -72.77  | 3.75 |
| <b>TFAA-AA</b>   | 2181     | -538 | -112.97 | 2431      | -291 | -70.80  | 4.75 |
| <b>TFAA-PA</b>   | 2174     | -545 | -113.96 | 2434      | -286 | -70.62  | 4.87 |
| <b>TFAA-MPA</b>  | 2148     | -571 | -117.17 | 2420      | -294 | -71.44  | 4.86 |
| <b>TFAA-FFA</b>  | 2341     | -378 | -82.87  | 2364      | -386 | -78.27  |      |
| <b>TFAA-FAA</b>  | 2232     | -487 | -101.13 | 2378      | -346 | -73.78  | 2.60 |
| <b>TFAA-DFAA</b> | 2295     | -424 | -86.30  | 2364      | -355 | -75.50  | 1.34 |

**Table S5.** Harmonic frequencies ( $\text{cm}^{-1}$ ) of the O–D stretching vibration and their shifts ( $\text{cm}^{-1}$ ) calculated at B3LYP-D3/aug-cc-pVDZ level using VPT2 method for various carboxylic acid dimer and the corresponding electric field along the O–D bond ( $\text{MV cm}^{-1}$ ). For each set of carboxylic acid dimer two cases arise, (i) frequency shift in a particular carboxylic acid (R) when the interaction partner is changed (R'), (ii) frequency shifts of the partners (R') when paired with a particular carboxylic acid (R). The  $pK_a$  values of the varying partner (R') are also listed.

| Dimer           | $\nu_{\text{O-D}}$ | $\Delta\nu_{\text{O-D}}$ | Field   | $\nu_{\text{O-D}}$ | $\Delta\nu_{\text{O-D}}$ | Field   | $pK_a$ |
|-----------------|--------------------|--------------------------|---------|--------------------|--------------------------|---------|--------|
|                 | <b>R</b>           |                          |         | <b>R'</b>          |                          |         |        |
| <b>FA-FA</b>    | 2252               | -450                     | -88.00  | 2252               | -450                     | -88.00  | 3.75   |
| <b>FA-AA</b>    | 2201               | -501                     | -98.87  | 2299               | -423                     | -86.16  | 4.75   |
| <b>FA-PA</b>    | 2196               | -506                     | -99.21  | 2310               | -413                     | -85.71  | 4.87   |
| <b>FA-MPA</b>   | 2185               | -517                     | -100.57 | 2305               | -417                     | -85.88  | 4.86   |
| <b>FA-FFA</b>   | 2327               | -375                     | -74.39  | 2172               | -573                     | -92.85  |        |
| <b>FA-FAA</b>   | 2242               | -460                     | -87.89  | 2235               | -489                     | -88.80  | 2.60   |
| <b>FA-DFAA</b>  | 2297               | -406                     | -76.80  | 2193               | -527                     | -90.91  | 1.34   |
| <b>FA-TFAA</b>  | 2335               | -367                     | -68.58  | 2163               | -551                     | -91.74  | 0.23   |
|                 | <b>R</b>           |                          |         | <b>R'</b>          |                          |         |        |
| <b>AA-AA</b>    | 2252               | -471                     | -96.99  | 2252               | -471                     | -96.99  | 4.75   |
| <b>AA-FA</b>    | 2299               | -423                     | -86.16  | 2201               | -501                     | -98.87  | 3.75   |
| <b>AA-PA</b>    | 2239               | -484                     | -98.78  | 2253               | -470                     | -97.05  | 4.87   |
| <b>AA-MPA</b>   | 2238               | -484                     | -98.64  | 2258               | -463                     | -96.72  | 4.86   |
| <b>AA-FFA</b>   | 2368               | -355                     | -72.33  | 2103               | -643                     | -104.12 |        |
| <b>AA-FAA</b>   | 2290               | -433                     | -86.00  | 2178               | -546                     | -99.85  | 2.60   |
| <b>AA-DFAA</b>  | 2343               | -380                     | -74.24  | 2135               | -584                     | -101.60 | 1.34   |
| <b>AA-TFAA</b>  | 2374               | -349                     | -66.81  | 2089               | -626                     | -103.18 | 0.23   |
|                 | <b>R</b>           |                          |         | <b>R'</b>          |                          |         |        |
| <b>PA-PA</b>    | 2260               | -463                     | -96.86  | 2260               | -463                     | -96.86  | 4.87   |
| <b>PA-FA</b>    | 2310               | -413                     | -85.71  | 2196               | -506                     | -99.21  | 3.75   |
| <b>PA-AA</b>    | 2253               | -470                     | -97.05  | 2239               | -484                     | -98.78  | 4.75   |
| <b>PA-MPA</b>   | 2232               | -490                     | -99.82  | 2239               | -483                     | -98.99  | 4.86   |
| <b>PA-FFA</b>   | 2366               | -357                     | -72.43  | 2084               | -662                     | -106.04 |        |
| <b>PA-FAA</b>   | 2302               | -421                     | -85.16  | 2169               | -555                     | -102.08 | 2.60   |
| <b>PA-DFAA</b>  | 2349               | -374                     | -74.60  | 2120               | -599                     | -102.53 | 1.34   |
| <b>PA-TFAA</b>  | 2383               | -340                     | -66.45  | 2082               | -632                     | -103.58 | 0.23   |
|                 | <b>R</b>           |                          |         | <b>R'</b>          |                          |         |        |
| <b>MPA-MPA</b>  | 2246               | -476                     | -98.34  | 2246               | -476                     | -98.34  | 4.86   |
| <b>MPA-FA</b>   | 2305               | -417                     | -85.88  | 2185               | -517                     | -100.57 | 3.75   |
| <b>MPA-AA</b>   | 2258               | -463                     | -96.72  | 2238               | -484                     | -98.64  | 4.75   |
| <b>MPA-PA</b>   | 2239               | -483                     | -98.99  | 2232               | -490                     | -99.82  | 4.87   |
| <b>MPA-FFA</b>  | 2371               | -351                     | -72.07  | 2082               | -664                     | -105.87 |        |
| <b>MPA-FAA</b>  | 2307               | -414                     | -84.84  | 2168               | -556                     | -101.96 | 2.60   |
| <b>MPA-DFAA</b> | 2339               | -383                     | -75.17  | 2095               | -624                     | -105.20 | 1.34   |
| <b>MPA-TFAA</b> | 2372               | -350                     | -67.01  | 2056               | -659                     | -106.23 | 0.23   |

|                  | <b>R</b> |      |         | <b>R'</b> |      |        |      |
|------------------|----------|------|---------|-----------|------|--------|------|
| <b>FFA-FFA</b>   | 2282     | -464 | -78.63  | 2282      | -464 | -78.63 |      |
| <b>FFA-FA</b>    | 2172     | -573 | -92.85  | 2327      | -375 | -74.39 | 3.75 |
| <b>FFA-AA</b>    | 2103     | -643 | -104.12 | 2368      | -355 | -72.33 | 4.75 |
| <b>FFA-PA</b>    | 2084     | -662 | -106.04 | 2366      | -357 | -72.43 | 4.87 |
| <b>FFA-MPA</b>   | 2082     | -664 | -105.87 | 2371      | -351 | -72.07 | 4.86 |
| <b>FFA-FAA</b>   | 2159     | -587 | -92.70  | 2316      | -408 | -74.91 | 2.60 |
| <b>FFA-DFAA</b>  | 2230     | -516 | -81.22  | 2283      | -436 | -77.08 | 1.34 |
| <b>FFA-TFAA</b>  | 2277     | -469 | -72.91  | 2262      | -452 | -77.84 | 0.23 |
|                  | <b>R</b> |      |         | <b>R'</b> |      |        |      |
| <b>FAA-FAA</b>   | 2242     | -482 | -88.15  | 2242      | -482 | -88.15 | 2.60 |
| <b>FAA-FA</b>    | 2235     | -489 | -88.80  | 2242      | -460 | -87.89 | 3.75 |
| <b>FAA-AA</b>    | 2178     | -546 | -99.85  | 2290      | -433 | -86.00 | 4.75 |
| <b>FAA-PA</b>    | 2169     | -555 | -102.08 | 2302      | -421 | -85.16 | 4.87 |
| <b>FAA-MPA</b>   | 2168     | -556 | -101.96 | 2307      | -414 | -84.84 | 4.86 |
| <b>FAA-FFA</b>   | 2316     | -408 | -74.91  | 2159      | -587 | -92.70 |      |
| <b>FAA-DFAA</b>  | 2289     | -435 | -77.86  | 2193      | -526 | -89.84 | 1.34 |
| <b>FAA-TFAA</b>  | 2325     | -399 | -69.08  | 2149      | -566 | -91.66 | 0.23 |
|                  | <b>R</b> |      |         | <b>R'</b> |      |        |      |
| <b>DFAA-DFAA</b> | 2245     | -475 | -79.42  | 2245      | -475 | -79.42 | 1.34 |
| <b>DFAA-FA</b>   | 2193     | -527 | -90.91  | 2297      | -406 | -76.80 | 3.75 |
| <b>DFAA-AA</b>   | 2135     | -584 | -101.60 | 2343      | -380 | -74.24 | 4.75 |
| <b>DFAA-PA</b>   | 2120     | -599 | -102.53 | 2349      | -374 | -74.60 | 4.87 |
| <b>DFAA-MPA</b>  | 2095     | -624 | -105.20 | 2339      | -383 | -75.17 | 4.86 |
| <b>DFAA-FFA</b>  | 2283     | -436 | -77.08  | 2230      | -516 | -81.22 |      |
| <b>DFAA-FAA</b>  | 2193     | -526 | -89.84  | 2289      | -435 | -77.86 | 2.60 |
| <b>DFAA-TFAA</b> | 2298     | -421 | -70.47  | 2223      | -492 | -79.54 | 0.23 |
|                  | <b>R</b> |      |         | <b>R'</b> |      |        |      |
| <b>TFAA-TFAA</b> | 2267     | -447 | -71.79  | 2267      | -447 | -71.79 | 0.23 |
| <b>TFAA-FA</b>   | 2163     | -551 | -91.74  | 2335      | -367 | -68.58 | 3.75 |
| <b>TFAA-AA</b>   | 2089     | -626 | -103.18 | 2374      | -349 | -66.81 | 4.75 |
| <b>TFAA-PA</b>   | 2082     | -632 | -103.58 | 2383      | -340 | -66.45 | 4.87 |
| <b>TFAA-MPA</b>  | 2056     | -659 | -106.23 | 2372      | -350 | -67.01 | 4.86 |
| <b>TFAA-FFA</b>  | 2262     | -452 | -77.84  | 2277      | -469 | -72.91 |      |
| <b>TFAA-FAA</b>  | 2149     | -566 | -91.66  | 2325      | -399 | -69.08 | 2.60 |
| <b>TFAA-DFAA</b> | 2223     | -492 | -79.54  | 2298      | -421 | -70.47 | 1.34 |

**Table S6.** Anharmonic frequencies ( $\text{cm}^{-1}$ ) of the O–D stretching vibration and their shifts ( $\text{cm}^{-1}$ ) calculated at B3LYP-D3/aug-cc-pVDZ level using VPT2 method for various carboxylic acid dimer and the corresponding electric field along the O–D bond ( $\text{MV cm}^{-1}$ ). For each set of carboxylic acid dimer two cases arise, (i) frequency shift in a particular carboxylic acid (R) when the interaction partner is changed (R'), (ii) frequency shifts of the partners (R') when paired with a particular carboxylic acid (R). The  $pK_a$  values of the varying partner (R') are also listed.

| Dimer           | $\nu_{\text{O-D}}$ | $\Delta\nu_{\text{O-D}}$ | Field   | $\nu_{\text{O-D}}$ | $\Delta\nu_{\text{O-D}}$ | Field   | $pK_a$ (R') |
|-----------------|--------------------|--------------------------|---------|--------------------|--------------------------|---------|-------------|
|                 | <b>R</b>           |                          |         | <b>R'</b>          |                          |         |             |
| <b>FA-FA</b>    | 2013               | -582                     | -88.00  | 2013               | -582                     | -88.00  | 3.75        |
| <b>FA-AA</b>    | 1959               | -637                     | -98.87  | 2067               | -554                     | -86.16  | 4.75        |
| <b>FA-PA</b>    | 1955               | -640                     | -99.21  | 2205               | -412                     | -85.71  | 4.87        |
| <b>FA-MPA</b>   | 1951               | -644                     | -100.57 | 2174               | -444                     | -85.88  | 4.86        |
| <b>FA-FFA</b>   | 2185               | -410                     | -74.39  | 1917               | -731                     | -92.85  |             |
| <b>FA-FAA</b>   | 2004               | -591                     | -87.89  | 2003               | -623                     | -88.80  | 2.60        |
| <b>FA-DFAA</b>  | 2040               | -555                     | -76.80  | 1947               | -669                     | -90.91  | 1.34        |
| <b>FA-TFAA</b>  | 2188               | -407                     | -68.58  | 1935               | -675                     | -91.74  | 0.23        |
|                 | <b>R</b>           |                          |         | <b>R'</b>          |                          |         |             |
| <b>AA-AA</b>    | 2022               | -600                     | -96.99  | 2022               | -600                     | -96.99  | 4.75        |
| <b>AA-FA</b>    | 2067               | -554                     | -86.16  | 1959               | -637                     | -98.87  | 3.75        |
| <b>AA-PA</b>    | 2015               | -606                     | -98.78  | 2024               | -592                     | -97.05  | 4.87        |
| <b>AA-MPA</b>   | 2012               | -609                     | -98.64  | 2011               | -607                     | -96.72  | 4.86        |
| <b>AA-FFA</b>   | 2221               | -400                     | -72.33  | 1836               | -811                     | -104.12 |             |
| <b>AA-FAA</b>   | 2058               | -564                     | -86.00  | 1935               | -691                     | -99.85  | 2.60        |
| <b>AA-DFAA</b>  | 2211               | -410                     | -74.24  | 1890               | -726                     | -101.60 | 1.34        |
| <b>AA-TFAA</b>  | 2225               | -396                     | -66.81  | 1832               | -778                     | -103.18 | 0.23        |
|                 | <b>R</b>           |                          |         | <b>R'</b>          |                          |         |             |
| <b>PA-PA</b>    | 2034               | -583                     | -96.86  | 2034               | -583                     | -96.86  | 4.87        |
| <b>PA-FA</b>    | 2205               | -412                     | -85.71  | 1955               | -640                     | -99.21  | 3.75        |
| <b>PA-AA</b>    | 2024               | -592                     | -97.05  | 2015               | -606                     | -98.78  | 4.75        |
| <b>PA-MPA</b>   | 2025               | -592                     | -99.82  | 1997               | -621                     | -98.99  | 4.86        |
| <b>PA-FFA</b>   | 2208               | -409                     | -72.43  | 1806               | -842                     | -106.04 |             |
| <b>PA-FAA</b>   | 2092               | -525                     | -85.16  | 1904               | -722                     | -102.08 | 2.60        |
| <b>PA-DFAA</b>  | 2170               | -447                     | -74.60  | 1887               | -729                     | -102.53 | 1.34        |
| <b>PA-TFAA</b>  | 2217               | -400                     | -66.45  | 1823               | -786                     | -103.58 | 0.23        |
|                 | <b>R</b>           |                          |         | <b>R'</b>          |                          |         |             |
| <b>MPA-MPA</b>  | 1986               | -632                     | -98.34  | 1986               | -632                     | -98.34  | 4.86        |
| <b>MPA-FA</b>   | 2174               | -444                     | -85.88  | 1951               | -644                     | -100.57 | 3.75        |
| <b>MPA-AA</b>   | 2011               | -607                     | -96.72  | 2012               | -609                     | -98.64  | 4.75        |
| <b>MPA-PA</b>   | 1997               | -621                     | -98.99  | 2025               | -592                     | -99.82  | 4.87        |
| <b>MPA-FFA</b>  | 2208               | -410                     | -72.07  | 1804               | -844                     | -105.87 |             |
| <b>MPA-FAA</b>  | 2170               | -448                     | -84.84  | 1938               | -688                     | -101.96 | 2.60        |
| <b>MPA-DFAA</b> | 2192               | -426                     | -75.17  | 1833               | -783                     | -105.20 | 1.34        |
| <b>MPA-TFAA</b> | 2208               | -410                     | -67.01  | 1805               | -805                     | -106.23 | 0.23        |

|                  |          |      |         |           |      |        |      |
|------------------|----------|------|---------|-----------|------|--------|------|
|                  | <b>R</b> |      |         | <b>R'</b> |      |        |      |
| <b>FFA-FFA</b>   | 2055     | -593 | -78.63  | 2055      | -593 | -78.63 |      |
| <b>FFA-FA</b>    | 1917     | -731 | -92.85  | 2185      | -410 | -74.39 | 3.75 |
| <b>FFA-AA</b>    | 1836     | -811 | -104.12 | 2221      | -400 | -72.33 | 4.75 |
| <b>FFA-PA</b>    | 1806     | -842 | -106.04 | 2208      | -409 | -72.43 | 4.87 |
| <b>FFA-MPA</b>   | 1804     | -844 | -105.87 | 2208      | -410 | -72.07 | 4.86 |
| <b>FFA-FAA</b>   | 1895     | -753 | -92.70  | 2172      | -454 | -74.91 | 2.60 |
| <b>FFA-DFAA</b>  | 1998     | -650 | -81.22  | 2054      | -562 | -77.08 | 1.34 |
| <b>FFA-TFAA</b>  | 2047     | -601 | -72.91  | 2022      | -588 | -77.84 | 0.23 |
|                  | <b>R</b> |      |         | <b>R'</b> |      |        |      |
| <b>FAA-FAA</b>   | 2015     | -611 | -88.15  | 2015      | -611 | -88.15 | 2.60 |
| <b>FAA-FA</b>    | 2003     | -623 | -88.80  | 2004      | -591 | -87.89 | 3.75 |
| <b>FAA-AA</b>    | 1935     | -691 | -99.85  | 2058      | -564 | -86.00 | 4.75 |
| <b>FAA-PA</b>    | 1904     | -722 | -102.08 | 2092      | -525 | -85.16 | 4.87 |
| <b>FAA-MPA</b>   | 1938     | -688 | -101.96 | 2170      | -448 | -84.84 | 4.86 |
| <b>FAA-FFA</b>   | 2172     | -454 | -74.91  | 1895      | -753 | -92.70 |      |
| <b>FAA-DFAA</b>  | 2056     | -570 | -77.86  | 1969      | -647 | -89.84 | 1.34 |
| <b>FAA-TFAA</b>  | 2176     | -450 | -69.08  | 1905      | -705 | -91.66 | 0.23 |
|                  | <b>R</b> |      |         | <b>R'</b> |      |        |      |
| <b>DFAA-DFAA</b> | 2011     | -605 | -79.42  | 2011      | -605 | -79.42 | 1.34 |
| <b>DFAA-FA</b>   | 1947     | -669 | -90.91  | 2040      | -555 | -76.80 | 3.75 |
| <b>DFAA-AA</b>   | 1890     | -726 | -101.60 | 2211      | -410 | -74.24 | 4.75 |
| <b>DFAA-PA</b>   | 1887     | -729 | -102.53 | 2170      | -447 | -74.60 | 4.87 |
| <b>DFAA-MPA</b>  | 1833     | -783 | -105.20 | 2192      | -426 | -75.17 | 4.86 |
| <b>DFAA-FFA</b>  | 2054     | -562 | -77.08  | 1998      | -650 | -81.22 |      |
| <b>DFAA-FAA</b>  | 1969     | -647 | -89.84  | 2056      | -570 | -77.86 | 2.60 |
| <b>DFAA-TFAA</b> | 2048     | -568 | -70.47  | 1989      | -621 | -79.54 | 0.23 |
|                  | <b>R</b> |      |         | <b>R'</b> |      |        |      |
| <b>TFAA-TFAA</b> | 2019     | -591 | -71.79  | 2019      | -591 | -71.79 | 0.23 |
| <b>TFAA-FA</b>   | 1935     | -675 | -91.74  | 2188      | -407 | -68.58 | 3.75 |
| <b>TFAA-AA</b>   | 1832     | -778 | -103.18 | 2225      | -396 | -66.81 | 4.75 |
| <b>TFAA-PA</b>   | 1823     | -786 | -103.58 | 2217      | -400 | -66.45 | 4.87 |
| <b>TFAA-MPA</b>  | 1805     | -805 | -106.23 | 2208      | -410 | -67.01 | 4.86 |
| <b>TFAA-FFA</b>  | 2022     | -588 | -77.84  | 2047      | -601 | -72.91 |      |
| <b>TFAA-FAA</b>  | 1905     | -705 | -91.66  | 2176      | -450 | -69.08 | 2.60 |
| <b>TFAA-DFAA</b> | 1989     | -621 | -79.54  | 2048      | -568 | -70.47 | 1.34 |

**Table S7.** Fitting parameters for linear least-square fits for the dimers of formic acid (FA) from the plots shown in Figures 3, 4, S1 and S2 for the O–H and O–D shifts corresponding to of R'.

|                | MP2 (Harmonic)                         |          |                | MP2 (Harmonic)                         |          |                | B3LYP-D3 (Harmonic)                    |          |                | B3LYP-D3 (Anharmonic)                  |          |                |
|----------------|----------------------------------------|----------|----------------|----------------------------------------|----------|----------------|----------------------------------------|----------|----------------|----------------------------------------|----------|----------------|
|                | O–H                                    |          |                | O–D                                    |          |                | O–D                                    |          |                | O–D                                    |          |                |
|                | Slope                                  | Residual | R <sup>2</sup> |
| FA             | 5.36                                   | 16.3     | 0.979          | 3.76                                   | 11.3     | 0.978          | 4.76                                   | 13.5     | 0.984          | 7.27                                   | 69.3     | 0.829          |
| AA             | 4.86                                   | 14.6     | 0.976          | 3.40                                   | 10.7     | 0.974          | 4.37                                   | 12.2     | 0.985          | 7.42                                   | 38.8     | 0.928          |
| PA             | 5.00                                   | 14.9     | 0.982          | 3.50                                   | 10.3     | 0.981          | 4.39                                   | 8.3      | 0.988          | 6.23                                   | 88.7     | 0.783          |
| MPA            | 4.92                                   | 14.9     | 0.973          | 3.45                                   | 11.5     | 0.970          | 4.23                                   | 12.2     | 0.80           | 7.44                                   | 63.1     | 0.833          |
| FFA            | 6.81                                   | 24.7     | 0.978          | 4.73                                   | 18.2     | 0.977          | 6.20                                   | 26.9     | 0.971          | 7.78                                   | 32.7     | 0.968          |
| FAA            | 5.36                                   | 20.3     | 0.976          | 3.75                                   | 15.0     | 0.975          | 5.02                                   | 11.1     | 0.991          | 7.80                                   | 46.8     | 0.919          |
| DFAA           | 6.37                                   | 18.6     | 0.978          | 4.45                                   | 14.0     | 0.976          | 5.78                                   | 15.7     | 0.982          | 6.05                                   | 27.9     | 0.941          |
| TFAA           | 6.90                                   | 24.3     | 0.976          | 4.80                                   | 18.4     | 0.974          | 6.23                                   | 20.6     | 0.979          | 6.66                                   | 25.7     | 0.963          |
| <b>Average</b> | <b>5.70 (<math>\sigma=0.86</math>)</b> |          |                | <b>3.98 (<math>\sigma=0.59</math>)</b> |          |                | <b>5.12 (<math>\sigma=0.83</math>)</b> |          |                | <b>7.08 (<math>\sigma=0.68</math>)</b> |          |                |

**Table S8.** Fitting parameters for linear least-square fits for the plots shown in Figures 3, 4, S1 and S2 for the O–H and O–D shifts of R' due to R.

|                | MP2 (Harmonic)                          |          |                | MP2 (Harmonic)                          |          |                | B3LYP-D3 (Harmonic)                     |          |                | B3LYP-D3 (Anharmonic)                   |          |                |
|----------------|-----------------------------------------|----------|----------------|-----------------------------------------|----------|----------------|-----------------------------------------|----------|----------------|-----------------------------------------|----------|----------------|
|                | O–H                                     |          |                | O–D                                     |          |                | O–D                                     |          |                | O–D                                     |          |                |
|                | Slope                                   | Residual | R <sup>2</sup> |
| FA             | 22.28                                   | 18.3     | 0.981          | 15.62                                   | 13.4     | 0.979          | 22.72                                   | 13.2     | 0.990          | 37.37                                   | 64.5     | 0.849          |
| AA             | 24.14                                   | 11.8     | 0.992          | 16.85                                   | 8.9      | 0.991          | 24.90                                   | 14.1     | 0.991          | 29.02                                   | 16.7     | 0.983          |
| PA             | 23.78                                   | 27.4     | 0.956          | 16.59                                   | 18.9     | 0.956          | 24.33                                   | 21.8     | 0.951          | 30.28                                   | 17.7     | 0.979          |
| MPA            | 24.10                                   | 8.1      | 0.995          | 16.78                                   | 5.9      | 0.995          | 24.15                                   | 13.8     | 0.984          | 28.67                                   | 42.9     | 0.909          |
| FFA            | 17.53                                   | 25.6     | 0.948          | 12.32                                   | 18.2     | 0.945          | 17.47                                   | 14.4     | 0.977          | 31.76                                   | 50.0     | 0.905          |
| FAA            | 22.96                                   | 12.4     | 0.986          | 16.13                                   | 9.6      | 0.986          | 22.52                                   | 17.3     | 0.985          | 32.26                                   | 46.1     | 0.933          |
| DFAA           | 20.13                                   | 36.7     | 0.889          | 14.10                                   | 26.2     | 0.885          | 21.24                                   | 14.9     | 0.964          | 35.42                                   | 39.3     | 0.929          |
| TFAA           | 19.48                                   | 22.0     | 0.960          | 13.74                                   | 16.1     | 0.956          | 20.21                                   | 14.5     | 0.981          | 36.27                                   | 50.7     | 0.883          |
| <b>Average</b> | <b>21.80 (<math>\sigma=2.48</math>)</b> |          |                | <b>15.29 (<math>\sigma=1.70</math>)</b> |          |                | <b>22.19 (<math>\sigma=2.49</math>)</b> |          |                | <b>32.63 (<math>\sigma=3.35</math>)</b> |          |                |

**Table S9.** Harmonic frequencies ( $\text{cm}^{-1}$ ) of the O–H stretching vibration and their shifts ( $\text{cm}^{-1}$ ) calculated at MP2/aug-cc-pVTZ level for various formic acid dimers and the corresponding electric field along the O–H bond ( $\text{MV cm}^{-1}$ ). For each set of carboxylic acid dimer two cases arise, (i) frequency shift in a particular carboxylic acid (R) when the interaction partner is changed (R'), (ii) frequency shifts of the partners (R') when paired with a particular carboxylic acid (R). The  $pK_a$  values of the varying partner (R') are also listed.

| Dimer          | $\nu_{\text{O-H}}$ | $\Delta\nu_{\text{O-H}}$ | Field   | $\nu_{\text{O-H}}$     | $\Delta\nu_{\text{O-H}}$ | Field   | $pK_a$ (R') |
|----------------|--------------------|--------------------------|---------|------------------------|--------------------------|---------|-------------|
|                | Effect of R' on FA |                          |         | Effect on R' due to FA |                          |         |             |
| <b>FA-FA</b>   | 3202               | -522                     | -96.54  | 3202                   | -522                     | -96.54  | 3.75        |
| <b>FA-AA</b>   | 3124               | -601                     | -107.36 | 3250                   | -492                     | -94.24  | 4.75        |
| <b>FA-PA</b>   | 3128               | -597                     | -107.77 | 3248                   | -490                     | -94.20  | 4.87        |
| <b>FA-MPA</b>  | 3109               | -616                     | -109.88 | 3236                   | -494                     | -94.46  | 4.86        |
| <b>FA-FFA</b>  | 3301               | -424                     | -77.95  | 3108                   | -670                     | -102.64 | -           |
| <b>FA-FAA</b>  | 3187               | -538                     | -95.82  | 3156                   | -588                     | -97.95  | 2.60        |
| <b>FA-DFAA</b> | 3255               | -470                     | -83.07  | 3108                   | -630                     | -100.76 | 1.34        |
| <b>FA-TFAA</b> | 3300               | -425                     | -72.77  | 3070                   | -667                     | -101.88 | 0.23        |



**Cartesian coordinates of various hydrogen bonded carboxylic acid dimers considered in the present investigation at MP2/aug-cc-pVDZ level of theory.**

|                                       |  |                                       |
|---------------------------------------|--|---------------------------------------|
| <b>FA-FA</b>                          |  | <b>FA-AA</b>                          |
| C -1.90542500 -0.16761700 -0.00010000 |  | C -1.41235000 -0.06944500 0.00025900  |
| H -3.00449800 -0.24009600 -0.00065300 |  | O -0.70120300 -1.08335800 -0.00010200 |
| O -1.18317100 -1.16724800 -0.00023200 |  | O -0.93293800 1.17618000 -0.00011100  |
| O -1.50008600 1.09414700 0.00016900   |  | H 0.06445900 1.14517400 -0.00037800   |
| H -0.49948600 1.11799300 0.00046100   |  | C 2.43088100 0.09796000 0.00045600    |
| C 1.90549100 0.16745700 -0.00014500   |  | H 3.53243700 0.11109400 0.00038000    |
| H 3.00458100 0.23959000 -0.00079300   |  | O 1.76330100 1.13499800 -0.00016600   |
| O 1.18356000 1.16732800 0.00010400    |  | O 1.95639100 -1.13914700 -0.00021100  |
| O 1.49969500 -1.09411700 0.00026800   |  | H 0.95174900 -1.10541400 -0.00000100  |
| H 0.49902700 -1.11740900 -0.00001900  |  | C -2.91636200 -0.11613300 0.00009300  |
|                                       |  | H -3.29563900 0.41251400 0.88685600   |
|                                       |  | H -3.29523100 0.41052100 -0.88805500  |
|                                       |  | H -3.25520200 -1.15756400 0.00107100  |
| <b>FA-PA</b>                          |  | <b>FA-MPA</b>                         |
| C -2.88634400 -0.18709200 0.00027100  |  | C -3.20813200 0.05750000 0.10728500   |
| H -3.97387600 -0.36348800 0.00098400  |  | H -4.30156100 0.14089900 0.21397900   |
| O -2.40690900 0.94917800 -0.00073700  |  | O -2.66373000 -0.98785100 -0.25668800 |
| O -2.20653600 -1.32441200 0.00064300  |  | O -2.59854800 1.19281700 0.41388900   |
| H -1.22311000 -1.11814300 -0.00008000 |  | H -1.60604900 1.07260400 0.30371300   |
| C 0.92861600 0.30852600 -0.00010000   |  | C 0.61786800 -0.11760900 -0.22181300  |
| O 0.40259300 -0.81303700 -0.00090600  |  | O 0.02482900 0.90914300 0.14036200    |
| O 0.24204000 1.45314300 0.00029200    |  | O 0.00184600 -1.25440900 -0.55384100  |
| H -0.73524100 1.25087700 -0.00022100  |  | H -0.98388500 -1.13930200 -0.44136600 |
| C 2.42363300 0.52224900 0.00056200    |  | C 2.12599700 -0.22176400 -0.27653200  |
| H 2.65917600 1.14476200 -0.87834800   |  | H 2.37127200 -0.94252000 -1.07317500  |
| H 2.65856400 1.14343700 0.88057700    |  | C 2.60198300 -0.79747700 1.07352300   |
| C 3.21821600 -0.78294000 -0.00012500  |  | C 2.76715400 1.13857700 -0.56298600   |
| H 2.98194600 -1.38530000 -0.88907200  |  | H 3.86286300 1.03432400 -0.59400100   |
| H 4.29721300 -0.56883900 0.00055600   |  | H 2.42990000 1.54695600 -1.52789100   |
| H 2.98108200 -1.38673900 0.88761300   |  | H 2.50295900 1.85965600 0.22474000    |
|                                       |  | H 3.69655900 -0.91475200 1.06232700   |
|                                       |  | H 2.33506700 -0.11066200 1.89284600   |
|                                       |  | H 2.14847600 -1.78017800 1.27218800   |
| <b>FA-FFA</b>                         |  | <b>FA-FAA</b>                         |
| C 2.35703000 0.13475100 0.00018600    |  | C 2.85345200 0.27587700 0.00018700    |
| H 3.45534000 0.20303100 0.00012600    |  | H 3.94510100 0.42075600 0.00076500    |
| O 1.63987900 1.13872000 -0.00003900   |  | O 2.06713200 1.22637000 -0.00070000   |
| O 1.94577200 -1.12462700 0.00001600   |  | O 2.53026000 -1.00911700 0.00056000   |
| H 0.94981100 -1.14433600 -0.00017100  |  | H 1.53234500 -1.09581400 0.00002300   |
| C -1.40605200 -0.08163900 -0.00005100 |  | C -0.92355200 -0.28081200 -0.00013300 |
| O -0.76508800 -1.11755400 0.00016000  |  | O -0.13769000 -1.23774600 -0.00040600 |
| O -0.99361700 1.16150500 -0.00032000  |  | O -0.59146900 0.99598100 0.00026700   |
| H 0.01213800 1.15391000 -0.00038600   |  | H 0.40921400 1.06986200 -0.00002900   |
| F -2.74874700 -0.11062500 0.00012000  |  | C -2.41519000 -0.55776800 -0.00032500 |
|                                       |  | H -2.65941000 -1.14384400 -0.89867300 |
|                                       |  | H -2.65942100 -1.14516600 0.89715800  |
|                                       |  | F -3.17799400 0.60739000 0.00051300   |
| <b>FA-DFAA</b>                        |  | <b>FA-TFAA</b>                        |
| C 3.17590400 -0.00429000 0.08936100   |  | C 0.35508400 0.04095300 -0.00001200   |
| H 4.27285200 -0.03595300 0.17577200   |  | O -0.28236500 1.09137400 -0.00002100  |

|               |             |             |             |                |             |             |             |
|---------------|-------------|-------------|-------------|----------------|-------------|-------------|-------------|
| O             | 2.56891300  | 1.04236800  | -0.15236400 | O              | -0.11319100 | -1.18946200 | -0.00020200 |
| O             | 2.63628700  | -1.19987100 | 0.27571300  | H              | -1.12080200 | -1.15835000 | -0.00051800 |
| H             | 1.64420300  | -1.13015100 | 0.19022700  | C              | -3.44450900 | -0.09978300 | 0.00013100  |
| C             | -0.62259000 | 0.07941700  | -0.18414700 | H              | -4.54424400 | -0.14154600 | 0.00035100  |
| O             | -0.04776100 | -0.98295700 | 0.04388800  | O              | -2.75094500 | -1.11998700 | 0.00013000  |
| O             | -0.06128700 | 1.26132900  | -0.38883500 | O              | -3.00294700 | 1.15001400  | -0.00011100 |
| H             | 0.93665600  | 1.17459300  | -0.29767900 | H              | -2.00704700 | 1.14586200  | -0.00023000 |
| C             | -2.15129800 | 0.19458100  | -0.24172800 | C              | 1.89889500  | 0.04016900  | 0.00005200  |
| H             | -2.49787900 | 0.89853300  | -1.01050200 | F              | 2.36497600  | -0.60025800 | -1.09624900 |
| F             | -2.57792000 | 0.64309300  | 0.99007700  | F              | 2.38235000  | 1.29153900  | 0.00061000  |
| F             | -2.70398500 | -1.03111700 | -0.46407200 | F              | 2.36499200  | -0.60122700 | 1.09575100  |
| <b>AA-AA</b>  |             |             |             | <b>AA-PA</b>   |             |             |             |
| C             | -1.93270300 | -0.06117900 | -0.00015300 | C              | 2.37484300  | -0.06841600 | 0.07796100  |
| O             | -1.24272800 | -1.08973500 | -0.00005700 | O              | 1.68509100  | -1.09210000 | -0.02595000 |
| O             | -1.42724000 | 1.17321400  | -0.00008600 | O              | 1.87917700  | 1.16898200  | 0.04326400  |
| H             | -0.42739400 | 1.11821200  | -0.00011700 | H              | 0.88550400  | 1.12188600  | -0.07862000 |
| C             | 1.93269300  | 0.06119900  | 0.00038200  | C              | 3.86947600  | -0.09562800 | 0.25718800  |
| O             | 1.24290700  | 1.08988800  | 0.00028900  | H              | 4.22154500  | -1.13241300 | 0.28499600  |
| O             | 1.42712500  | -1.17310900 | -0.00010000 | H              | 4.34374300  | 0.44858200  | -0.57272500 |
| H             | 0.42726600  | -1.11786000 | 0.00008100  | H              | 4.13286600  | 0.42503500  | 1.18951400  |
| C             | -3.43810100 | -0.07730800 | -0.00014000 | C              | -1.46022800 | 0.08803400  | -0.37550700 |
| H             | -3.80656700 | 0.45763700  | 0.88744800  | O              | -0.76712300 | 1.11095200  | -0.27411700 |
| H             | -3.80659400 | 0.45800800  | -0.88748900 | O              | -0.96483800 | -1.15067800 | -0.35739900 |
| H             | -3.79838700 | -1.11162900 | -0.00033800 | H              | 0.02836400  | -1.10475800 | -0.23494900 |
| C             | 3.43806900  | 0.07704400  | -0.00002900 | C              | -2.96438500 | 0.12428300  | -0.47098100 |
| H             | 3.80666200  | -0.45803000 | 0.88742800  | H              | -3.25350100 | 1.09929900  | -0.88635100 |
| H             | 3.80627000  | -0.45825300 | -0.88751500 | H              | -3.29922400 | -0.67799800 | -1.14482600 |
| H             | 3.79848500  | 1.11131600  | -0.00022400 | C              | -3.57453000 | -0.06950000 | 0.93090900  |
| <b>AA-MPA</b> |             |             |             | <b>AA-FFA</b>  |             |             |             |
| C             | 2.73885200  | 0.00060800  | 0.02995200  | C              | 1.87001100  | -0.05817900 | -0.00051700 |
| O             | 2.13672600  | -1.02378800 | -0.31998100 | O              | 1.14831100  | -1.06597300 | -0.00183000 |
| O             | 2.13492700  | 1.14690000  | 0.34550000  | O              | 1.40340000  | 1.19126300  | -0.00224100 |
| H             | 1.14350700  | 1.03225100  | 0.25199300  | H              | 0.40994300  | 1.17107700  | -0.00446300 |
| C             | 4.23827100  | 0.07815100  | 0.14268500  | C              | 3.37187000  | -0.12240000 | 0.00318300  |
| H             | 4.68123000  | -0.88785200 | -0.12240200 | H              | 3.69881100  | -1.16753000 | 0.00469600  |
| H             | 4.61150400  | 0.86783700  | -0.52584500 | H              | 3.75822900  | 0.40066500  | -0.88380500 |
| H             | 4.51112200  | 0.35688300  | 1.17105700  | H              | 3.75395200  | 0.40192300  | 0.89128100  |
| C             | -1.11530000 | -0.11750200 | -0.22597100 | C              | -1.91655000 | 0.06119000  | 0.00017700  |
| O             | -0.50781900 | 0.90506400  | 0.12385300  | O              | -1.31378400 | 1.11990100  | -0.00017600 |
| O             | -0.51416000 | -1.25949400 | -0.56459800 | O              | -1.45927400 | -1.16483100 | -0.00129200 |
| C             | -2.62562000 | -0.20840700 | -0.25608400 | H              | -0.45004700 | -1.11799600 | -0.00269500 |
| H             | 0.47681600  | -1.14887500 | -0.46780600 | F              | -3.26134300 | 0.04281200  | 0.00247100  |
| H             | -2.89049700 | -0.92815000 | -1.04741200 |                |             |             |             |
| C             | -3.08534500 | -0.77716700 | 1.10223600  |                |             |             |             |
| C             | -3.25909500 | 1.15713500  | -0.53480800 |                |             |             |             |
| H             | -4.18107100 | -0.88410600 | 1.10975400  |                |             |             |             |
| H             | -2.63773000 | -1.76373700 | 1.29515200  |                |             |             |             |
| H             | -2.79815900 | -0.09173600 | 1.91589200  |                |             |             |             |
| H             | -4.35619200 | 1.06358700  | -0.54664700 |                |             |             |             |
| H             | -2.97405100 | 1.87745400  | 0.24634000  |                |             |             |             |
| H             | -2.93446100 | 1.56008600  | -1.50633300 |                |             |             |             |
| <b>AA-FAA</b> |             |             |             | <b>AA-DFAA</b> |             |             |             |
| C             | -2.37274600 | -0.12760500 | -0.00040100 | C              | 2.70823500  | -0.10799200 | -0.00023200 |
| O             | -1.59005500 | -1.08779300 | -0.00405900 | O              | 1.93744300  | -1.07804500 | -0.00036000 |
| O             | -1.98622200 | 1.14920600  | -0.00128000 | O              | 2.30284300  | 1.16371800  | 0.00085800  |

|                |             |             |             |               |             |             |             |
|----------------|-------------|-------------|-------------|---------------|-------------|-------------|-------------|
| H              | -0.98895600 | 1.19463700  | -0.00500700 | H             | 1.30778700  | 1.19059800  | 0.00141900  |
| C              | -3.86914000 | -0.28486700 | 0.00532500  | C             | 4.20569500  | -0.24523900 | -0.00091000 |
| H              | -4.13057500 | -1.34839200 | 0.00651500  | H             | 4.48102500  | -1.30517100 | -0.00359800 |
| H              | -4.28241300 | 0.21382600  | 0.89423400  | H             | 4.61519600  | 0.26117600  | -0.88717700 |
| H              | -4.28904600 | 0.21328200  | -0.88079800 | H             | 4.61531600  | 0.25645000  | 0.88801700  |
| C              | 1.44310300  | 0.28046700  | -0.00110200 | C             | -1.10829700 | 0.23705800  | 0.00096600  |
| O              | 0.70267500  | 1.27293500  | -0.00224700 | O             | -0.40954300 | 1.25636300  | 0.00231500  |
| O              | 1.05101000  | -0.97831900 | -0.00282900 | O             | -0.68973600 | -1.00993200 | -0.00052200 |
| H              | 0.04417600  | -0.99998400 | -0.00479000 | H             | 0.31989700  | -1.02047300 | -0.00055000 |
| C              | 2.94619900  | 0.48872500  | 0.00255600  | C             | -2.63482800 | 0.35710600  | 0.00068400  |
| H              | 3.21534400  | 1.06272400  | 0.90158700  | H             | -2.95497800 | 1.40665500  | 0.00314600  |
| H              | 3.21950800  | 1.06448000  | -0.89408300 | F             | -3.14159700 | -0.27458400 | 1.10920100  |
| F              | 3.65646700  | -0.70990400 | 0.00304400  | F             | -3.14030600 | -0.26893500 | -1.11171600 |
| <b>AA-TFAA</b> |             |             |             | <b>PA-PA</b>  |             |             |             |
| C              | 0.82411100  | 0.05369900  | 0.00001400  | C             | -1.90661500 | 0.32323600  | 0.00025200  |
| O              | 0.20743400  | 1.11682300  | 0.00020500  | O             | -1.43446900 | -0.82193800 | 0.00045400  |
| O              | 0.33142100  | -1.16592400 | -0.00034800 | O             | -1.16618500 | 1.43315100  | -0.00032900 |
| H              | -0.68012600 | -1.11215500 | -0.00055700 | C             | -3.39052400 | 0.60765000  | 0.00084000  |
| C              | -2.99568700 | -0.05338500 | -0.00012300 | H             | -3.59646700 | 1.23813900  | 0.88150700  |
| O              | -2.27997300 | -1.06531600 | -0.00015900 | H             | -3.59683100 | 1.24119700  | -0.87750700 |
| O              | -2.52066200 | 1.19370400  | -0.00011500 | C             | -4.24586100 | -0.65861400 | -0.00102200 |
| H              | -1.52760900 | 1.16718000  | -0.00003600 | H             | -4.03776700 | -1.27077700 | -0.89034900 |
| C              | 2.36762600  | 0.02374300  | 0.00011100  | H             | -4.03718100 | -1.27377700 | 0.88608000  |
| C              | -4.49782400 | -0.10765800 | 0.00009300  | H             | -5.31377300 | -0.39442400 | -0.00025600 |
| H              | -4.87831800 | 0.41850600  | 0.88779000  | H             | -0.19736600 | 1.18068400  | -0.00028200 |
| H              | -4.87858800 | 0.41870700  | -0.88736600 | C             | 1.90663100  | -0.32324700 | 0.00004200  |
| H              | -4.83145000 | -1.15065200 | 0.00004000  | O             | 1.43444500  | 0.82190900  | -0.00009700 |
| F              | 2.82304000  | -0.62518000 | -1.09623400 | O             | 1.16618300  | -1.43315100 | 0.00027900  |
| F              | 2.82297800  | -0.62644200 | 1.09570800  | H             | 0.19736600  | -1.18055300 | 0.00035100  |
| F              | 2.87631300  | 1.26559200  | 0.00084800  | C             | 3.39053800  | -0.60764900 | -0.00005200 |
| <b>PA-MPA</b>  |             |             |             | <b>PA-FFA</b> |             |             |             |
| C              | -2.28419900 | 0.30178500  | -0.25968600 | C             | 2.35080000  | -0.05979800 | 0.09089500  |
| O              | -1.53236900 | 1.07722000  | 0.34984600  | O             | 1.75631100  | -1.12136800 | 0.02455500  |
| O              | -1.85782600 | -0.74444500 | -0.96808900 | O             | 1.89383600  | 1.16383800  | 0.02184800  |
| H              | -0.85782400 | -0.79822600 | -0.90730500 | H             | 0.89126500  | 1.11407000  | -0.10539400 |
| C              | -3.78682800 | 0.41927300  | -0.21930100 | F             | 3.68504900  | -0.03661200 | 0.26101600  |
| H              | -4.03860400 | 1.46471200  | 0.00519100  | C             | -1.40340600 | 0.05307100  | -0.38124100 |
| H              | -4.19317200 | 0.14500100  | -1.20395900 | O             | -0.68759900 | 1.06337100  | -0.29882600 |
| C              | -4.34817300 | -0.51843400 | 0.86728600  | O             | -0.93628900 | -1.19553000 | -0.33166100 |
| H              | -3.93397000 | -0.25837700 | 1.85344000  | H             | 0.04960100  | -1.17215000 | -0.20547400 |
| H              | -5.44324600 | -0.42807900 | 0.91813000  | C             | -2.90348200 | 0.12357300  | -0.48528100 |
| H              | -4.09575100 | -1.56564000 | 0.64418700  | H             | -3.25661800 | -0.69998000 | -1.12261100 |
| C              | 1.54616200  | -0.17884600 | -0.21824100 | H             | -3.16563900 | 1.08592700  | -0.94530700 |
| O              | 0.79354500  | -0.94861400 | -0.83477000 | C             | -3.52055000 | 0.01090100  | 0.92314800  |
| O              | 1.11914100  | 0.88098000  | 0.46955800  | H             | -4.61633400 | 0.07888300  | 0.86054000  |
| H              | 0.11954000  | 0.93517600  | 0.40534400  | H             | -3.25815300 | -0.95142100 | 1.38697400  |
| C              | 3.04576000  | -0.37201500 | -0.15496500 | H             | -3.15980900 | 0.82521700  | 1.56967800  |
| H              | 3.26916800  | -1.19393300 | -0.85236000 |               |             |             |             |
| C              | 3.44263800  | -0.78877100 | 1.27326700  |               |             |             |             |
| C              | 3.78690500  | 0.90241600  | -0.58814100 |               |             |             |             |
| H              | 4.87273400  | 0.71820500  | -0.58401900 |               |             |             |             |
| H              | 3.49509700  | 1.21260300  | -1.60379700 |               |             |             |             |

|                |             |             |             |                |             |                         |
|----------------|-------------|-------------|-------------|----------------|-------------|-------------------------|
| H              | 3.56782200  | 1.72819800  | 0.10500900  |                |             |                         |
| H              | 4.52467400  | -0.98951300 | 1.31412400  |                |             |                         |
| H              | 3.20864200  | 0.01741500  | 1.98526500  |                |             |                         |
| H              | 2.91137400  | -1.70111200 | 1.58707000  |                |             |                         |
| <b>PA-FAA</b>  |             |             |             | <b>PA-DFAA</b> |             |                         |
| C              | 1.90487000  | 0.21403100  | 0.02443300  | C              | -1.56175200 | -0.07266800 -0.18646700 |
| O              | 1.33299300  | -0.86689300 | -0.11507500 | O              | -1.08404100 | 1.04187100 0.01615100   |
| O              | 1.31890100  | 1.40798900  | 0.05650900  | O              | -0.89668800 | -1.20119100 -0.37586100 |
| H              | 0.32473400  | 1.29092300  | -0.05327200 | H              | 0.09409600  | -1.01850600 -0.29709900 |
| C              | 3.40744700  | 0.35615900  | 0.18579100  | C              | -3.07411800 | -0.32705600 -0.22497500 |
| H              | 3.80316100  | 0.97447200  | -0.63395800 | H              | -3.36211900 | -1.07876200 -0.97218000 |
| H              | 3.62436400  | 0.84336900  | 1.14830500  | F              | -3.73929300 | 0.83706600 -0.47159700  |
| F              | 4.02696300  | -0.88807600 | 0.15641000  | F              | -3.44971700 | -0.78114800 1.02203800  |
| C              | -1.91123200 | 0.07950900  | -0.36837600 | C              | 2.24022100  | 0.31944600 0.04688200   |
| O              | -1.29121700 | 1.14419000  | -0.22408100 | O              | 1.68204000  | -0.76440600 -0.17816800 |
| O              | -1.32969700 | -1.12004800 | -0.41662200 | O              | 1.58835100  | 1.47056400 0.22028600   |
| H              | -0.34331400 | -1.01390400 | -0.30335700 | H              | 0.60928200  | 1.31044900 0.14152800   |
| C              | -3.41450600 | 0.01357000  | -0.44571600 | C              | 3.73797400  | 0.47092800 0.15339500   |
| H              | -3.77721500 | 0.98368100  | -0.81169000 | H              | 4.03637600  | 1.23155600 -0.58676300  |
| H              | -3.70105900 | -0.77881500 | -1.15257500 | H              | 3.94483500  | 0.91537100 1.14090500   |
| C              | -3.98898000 | -0.28744000 | 0.95261700  | C              | 4.49233900  | -0.84274000 -0.04676200 |
| H              | -5.08751700 | -0.32080100 | 0.91110700  | H              | 5.57539200  | -0.67295100 0.04211800  |
| H              | -3.62546300 | -1.25806900 | 1.32108200  | H              | 4.19233400  | -1.58599200 0.70578600  |
| H              | -3.69380400 | 0.49495900  | 1.66833000  | H              | 4.28561800  | -1.26658000 -1.03996600 |
| <b>PA-TFAA</b> |             |             |             | <b>MPA-MPA</b> |             |                         |
| C              | -1.26377200 | 0.08477900  | -0.00046800 | C              | -1.91581300 | -0.05299400 -0.23535900 |
| O              | -0.74648800 | 1.19959900  | -0.00155100 | O              | -1.35739600 | 0.84165300 0.41663200   |
| O              | -0.66225100 | -1.08504600 | -0.00015800 | O              | -1.26446700 | -1.04372800 -0.84682100 |
| H              | 0.34073600  | -0.93973300 | -0.00143800 | H              | -0.28171200 | -0.94695600 -0.67168300 |
| C              | -2.79821000 | -0.08560800 | 0.00057100  | C              | -3.41976500 | -0.15821600 -0.36804500 |
| F              | -3.41811000 | 1.10473400  | 0.00178500  | H              | -3.62622400 | -0.63321000 -1.34075100 |
| F              | -3.19208100 | -0.77482200 | 1.09610700  | C              | -3.92191600 | -1.09120300 0.75324900  |
| F              | -3.19335000 | -0.77319100 | -1.09577200 | C              | -4.08245400 | 1.21952300 -0.28896800  |
| C              | 2.54954700  | 0.31850000  | -0.00070700 | H              | -3.72789600 | 1.88288300 -1.09264900  |
| O              | 1.92558700  | -0.75277500 | -0.00320900 | H              | -5.17453400 | 1.11383400 -0.38225700  |
| O              | 1.96624600  | 1.51914200  | 0.00030700  | H              | -3.85466000 | 1.69858000 0.67483800   |
| H              | 0.97965800  | 1.40548600  | -0.00099600 | H              | -3.69305000 | -0.65488400 1.73893800  |
| C              | 4.05602500  | 0.39709900  | 0.00130400  | H              | -5.01298700 | -1.21545400 0.67413200  |
| H              | 4.34590700  | 0.99653700  | -0.87741600 | H              | -3.45246700 | -2.08427900 0.68752500  |
| H              | 4.34366000  | 0.99564700  | 0.88135100  | C              | 1.91570300  | 0.05395900 0.23472900   |
| C              | 4.73100900  | -0.97379500 | 0.00134000  | O              | 1.35721600  | -0.84006200 -0.41807400 |
| H              | 5.82439400  | -0.85508100 | 0.00234900  | O              | 1.26446500  | 1.04474100 0.84619200   |
| H              | 4.44184900  | -1.55365000 | 0.88953300  | H              | 0.28178200  | 0.94835500 0.67062000   |
| H              | 4.44333900  | -1.55289600 | -0.88781600 | C              | 3.41965700  | 0.15827300 0.36829100   |
|                |             |             |             | H              | 3.62581500  | 0.63460800 1.34039100   |
|                |             |             |             | C              | 4.08120300  | -1.22024600 0.29199900  |
|                |             |             |             | C              | 3.92347500  | 1.08886100 -0.75416400  |
|                |             |             |             | H              | 5.17334200  | -1.11535900 0.38554500  |
|                |             |             |             | H              | 3.72573800  | -1.88178700 1.09678100  |
|                |             |             |             | H              | 3.85334100  | -1.70081500 -0.67103000 |
|                |             |             |             | H              | 5.01456700  | 1.21243600 -0.67430900  |
|                |             |             |             | H              | 3.69508900  | 0.65102300 -1.73928300  |
|                |             |             |             | H              | 3.45477300  | 2.08245000 -0.69062800  |
| <b>MPA-FFA</b> |             |             |             | <b>MPA-FAA</b> |             |                         |
| C              | 2.70633500  | 0.01186200  | 0.03970400  | C              | 2.26418600  | 0.22954800 0.05651700   |
| O              | 2.20594600  | -1.04630300 | -0.29838400 | O              | 1.76460700  | -0.84676300 -0.27010700 |
| O              | 2.13796700  | 1.15047000  | 0.34248400  | O              | 1.59699700  | 1.34635500 0.33545800   |
| H              | 1.13707500  | 1.03060300  | 0.25311300  | H              | 0.60950900  | 1.17357400 0.23819500   |

|                 |             |             |             |                 |             |             |             |
|-----------------|-------------|-------------|-------------|-----------------|-------------|-------------|-------------|
| F               | 4.04233700  | 0.12915300  | 0.14817700  | C               | 3.75869100  | 0.45572400  | 0.19575900  |
| C               | -1.06668600 | -0.14333800 | -0.22860200 | H               | 4.07192700  | 1.24796800  | -0.50074900 |
| O               | -0.43754400 | 0.86949800  | 0.11499800  | H               | 3.98402900  | 0.76605600  | 1.22715400  |
| O               | -0.48995000 | -1.29999500 | -0.55976100 | F               | 4.46308200  | -0.70766400 | -0.09284300 |
| H               | 0.49599700  | -1.21403900 | -0.46622000 | C               | -1.54774800 | -0.12725000 | -0.22389300 |
| C               | -2.57639100 | -0.20079000 | -0.25737100 | O               | -0.99579200 | 0.93530300  | 0.10025800  |
| H               | -2.85657400 | -0.92591600 | -1.03820100 | O               | -0.88721000 | -1.24554200 | -0.52859600 |
| C               | -3.04583800 | -0.74104900 | 1.11000500  | H               | 0.09367100  | -1.08562000 | -0.43222300 |
| C               | -3.17972400 | 1.17454100  | -0.55461200 | C               | -3.05033900 | -0.29600400 | -0.25719900 |
| H               | -4.14339100 | -0.82420100 | 1.11745300  | H               | -3.27311100 | -1.05330300 | -1.02600500 |
| H               | -2.62018300 | -1.73444700 | 1.31676800  | C               | -3.48711900 | -0.84448400 | 1.11725900  |
| H               | -2.74470900 | -0.05027500 | 1.91385600  | C               | -3.75131900 | 1.02577600  | -0.58187900 |
| H               | -4.27817200 | 1.10221400  | -0.56816600 | H               | -4.57581000 | -1.00746600 | 1.12312300  |
| H               | -2.88322000 | 1.89847700  | 0.21878900  | H               | -2.99076100 | -1.80017600 | 1.34336100  |
| H               | -2.84538400 | 1.55850100  | -1.53043000 | H               | -3.24057500 | -0.11958200 | 1.90968600  |
|                 |             |             |             | H               | -4.84181500 | 0.87456600  | -0.59614600 |
|                 |             |             |             | H               | -3.50971200 | 1.78385900  | 0.17784400  |
|                 |             |             |             | H               | -3.44202500 | 1.41442400  | -1.56414500 |
| <b>MPA-DFAA</b> |             |             |             | <b>MPA-TFAA</b> |             |             |             |
| C               | -1.92575000 | -0.01417800 | -0.21591000 | C               | -1.61125900 | 0.04017000  | -0.00446400 |
| O               | -1.28518500 | 0.90794100  | 0.28614700  | O               | -0.94773600 | 1.05416500  | 0.20327100  |
| O               | -1.43837700 | -1.09384000 | -0.80429900 | O               | -1.17449500 | -1.17013400 | -0.27326100 |
| H               | -0.42742500 | -1.07048600 | -0.75680700 | H               | -0.15915700 | -1.15975500 | -0.28798900 |
| C               | -3.45935300 | -0.05213000 | -0.20496200 | C               | -3.15441700 | 0.07460700  | 0.02951000  |
| H               | -3.88271300 | -0.48685000 | -1.12038900 | F               | -3.62055500 | -0.77127900 | 0.97718400  |
| F               | -3.95842400 | 1.20383600  | -0.02519000 | F               | -3.60617100 | 1.30868000  | 0.30253700  |
| F               | -3.84687700 | -0.82636600 | 0.86874600  | F               | -3.65801800 | -0.31104600 | -1.16556200 |
| C               | 1.89509700  | -0.18918300 | -0.19873100 | C               | 2.19319700  | -0.23040200 | -0.11676300 |
| O               | 1.17621900  | -1.06610400 | -0.70420600 | O               | 1.42754500  | -1.18690700 | -0.31714300 |
| O               | 1.42011300  | 0.91548300  | 0.37903300  | O               | 1.77544400  | 1.00821100  | 0.15278900  |
| H               | 0.42462000  | 0.90626100  | 0.34223100  | H               | 0.78173100  | 1.02496200  | 0.17126100  |
| C               | 3.40233800  | -0.29236800 | -0.15295000 | C               | 3.69755100  | -0.37006600 | -0.12623000 |
| H               | 3.66022400  | -1.15298400 | -0.78890100 | H               | 3.89836700  | -1.38653900 | -0.49756700 |
| C               | 3.83837200  | -0.57851500 | 1.29676600  | C               | 4.34793100  | 0.66975600  | -1.05183900 |
| C               | 4.06705200  | 0.98307800  | -0.69313700 | C               | 4.22105400  | -0.23894200 | 1.31687100  |
| H               | 5.16068300  | 0.85488300  | -0.69546700 | H               | 5.43655100  | 0.50691800  | -1.07892700 |
| H               | 3.74472700  | 1.20093100  | -1.72334600 | H               | 3.96340100  | 0.59107700  | -2.08068900 |
| H               | 3.81603900  | 1.84620300  | -0.05902800 | H               | 4.15440200  | 1.68801100  | -0.68326800 |
| H               | 4.93002300  | -0.71716300 | 1.33311300  | H               | 5.30993900  | -0.40108800 | 1.32967100  |
| H               | 3.57069500  | 0.26576300  | 1.95034800  | H               | 4.01242200  | 0.76784700  | 1.70979700  |
| H               | 3.36213900  | -1.49185600 | 1.68638100  | H               | 3.75465600  | -0.98204100 | 1.98252500  |
| <b>FFA-FFA</b>  |             |             |             | <b>FFA-FAA</b>  |             |             |             |
| C               | 1.85860400  | -0.06451700 | -0.00010700 | C               | -1.38663200 | 0.26811700  | -0.00415800 |
| O               | 1.20986400  | -1.09637100 | -0.00161600 | O               | -0.61574200 | 1.23829300  | -0.00716200 |
| O               | 1.45307600  | 1.18195600  | 0.00025700  | O               | -1.03211700 | -1.00243600 | -0.00934400 |
| H               | 0.45446600  | 1.17925600  | -0.00108200 | H               | -0.03544200 | -1.05542900 | -0.01623300 |
| F               | 3.19664600  | -0.10235000 | 0.00156400  | C               | -2.88159600 | 0.51983900  | 0.00661000  |
| C               | -1.85861600 | 0.06451100  | -0.00021700 | H               | -3.12919200 | 1.09966700  | 0.90817600  |
| O               | -1.20935700 | 1.09603400  | -0.00191400 | H               | -3.14106500 | 1.10547900  | -0.88783200 |
| O               | -1.45361200 | -1.18215700 | 0.00003500  | F               | -3.62052800 | -0.65899400 | 0.00766400  |
| H               | -0.45504500 | -1.17997700 | -0.00135900 | C               | 2.35391700  | -0.13503000 | 0.00076400  |
| F               | -3.19654800 | 0.10291300  | 0.00180100  | O               | 1.65743400  | -1.13517500 | -0.00434600 |
|                 |             |             |             | O               | 2.00836500  | 1.12798800  | -0.00159500 |
|                 |             |             |             | H               | 1.00274700  | 1.17300800  | -0.00746800 |
|                 |             |             |             | F               | 3.69222800  | -0.23763300 | 0.01051700  |
| <b>FFA-DFAA</b> |             |             |             | <b>FFA-TFAA</b> |             |             |             |
| C               | -1.06706900 | -0.10092300 | -0.19037600 | C               | -0.78141400 | 0.02268000  | -0.00177100 |
| O               | -0.46308200 | 0.94862100  | 0.02399300  | O               | -0.13156200 | 1.06588300  | -0.00392000 |

|                  |             |             |             |                  |             |             |             |
|------------------|-------------|-------------|-------------|------------------|-------------|-------------|-------------|
| O                | -0.53753700 | -1.29761300 | -0.39313600 | O                | -0.32685200 | -1.21321100 | -0.00017500 |
| H                | 0.45708600  | -1.23470100 | -0.31719900 | H                | 0.67407500  | -1.19312900 | -0.00219300 |
| C                | -2.59861600 | -0.17635200 | -0.22910000 | C                | -2.32491200 | 0.04032200  | 0.00030900  |
| H                | -2.97205600 | -0.87110700 | -0.99344000 | F                | -2.79081700 | 1.29741700  | -0.00489100 |
| F                | -3.11924300 | 1.06314200  | -0.44435500 | F                | -2.79333400 | -0.58982600 | 1.10048900  |
| F                | -3.01748500 | -0.61423600 | 1.00825100  | F                | -2.79743800 | -0.60054500 | -1.09161200 |
| C                | 2.67991100  | -0.00639800 | 0.03461800  | C                | 2.96620300  | -0.05134600 | 0.00008100  |
| O                | 2.12272400  | -1.06733600 | -0.18843200 | O                | 2.33787500  | -1.09570100 | -0.00222600 |
| O                | 2.17077200  | 1.18603400  | 0.22231700  | O                | 2.53573300  | 1.18712900  | 0.00094000  |
| H                | 1.17415800  | 1.11058200  | 0.15392800  | H                | 1.53722300  | 1.16566800  | 0.00071000  |
| F                | 4.01588800  | 0.05549700  | 0.11920700  | F                | 4.30468800  | -0.06207600 | 0.00188200  |
| <b>FAA-FAA</b>   |             |             |             | <b>FAA-DFAA</b>  |             |             |             |
| C                | 1.89197500  | -0.24883900 | -0.00057600 | C                | 2.24097800  | 0.24286200  | 0.03696700  |
| O                | 1.39720600  | 0.87818900  | -0.00882000 | O                | 1.69827400  | -0.83909500 | -0.18786500 |
| O                | 1.21850500  | -1.39715200 | 0.00024700  | O                | 1.61860000  | 1.40626200  | 0.21444800  |
| H                | 0.23550900  | -1.20310300 | -0.00463000 | H                | 0.63251200  | 1.26766200  | 0.13851300  |
| C                | 3.38641600  | -0.51066600 | 0.00890900  | C                | 3.74311300  | 0.42123400  | 0.14975300  |
| H                | 3.64835900  | -1.07810700 | 0.91470700  | H                | 4.08066600  | 1.13915000  | -0.61284100 |
| H                | 3.65781000  | -1.09722800 | -0.88165800 | H                | 3.98692600  | 0.80902100  | 1.15032800  |
| F                | 4.09460000  | 0.68542200  | 0.00007400  | F                | 4.39574300  | -0.78962200 | -0.04227200 |
| C                | -1.89155800 | 0.24782300  | -0.00282100 | C                | -1.54299000 | -0.08608500 | -0.18795200 |
| O                | -1.39935100 | -0.88036800 | -0.01275400 | O                | -1.03158700 | 1.01374500  | 0.01472200  |
| O                | -1.21644700 | 1.39507300  | 0.00254900  | O                | -0.91332300 | -1.23408200 | -0.38198000 |
| H                | -0.23286900 | 1.20125300  | -0.00409400 | H                | 0.07843100  | -1.08510100 | -0.30913700 |
| C                | -3.38561700 | 0.51244000  | 0.00494000  | C                | -3.06257000 | -0.29368300 | -0.21840600 |
| H                | -3.64748900 | 1.08805000  | 0.90545400  | H                | -3.37641400 | -1.04720000 | -0.95314700 |
| H                | -3.65517300 | 1.09179100  | -0.89101800 | F                | -3.44499600 | -0.71620100 | 1.03694700  |
| F                | -4.09601700 | -0.68243700 | 0.00534300  | F                | -3.68952700 | 0.88758500  | -0.48028500 |
| <b>FAA-TFAA</b>  |             |             |             | <b>DFAA-DFAA</b> |             |             |             |
| C                | 1.24808400  | 0.02548800  | -0.00100500 | C                | 1.89335800  | 0.12866200  | -0.19042100 |
| O                | 0.56350900  | 1.04635300  | -0.00033300 | O                | 1.34176100  | -0.97050600 | -0.21162800 |
| O                | 0.83552700  | -1.22434700 | -0.00184100 | O                | 1.30466800  | 1.31475500  | -0.20679500 |
| H                | -0.17321000 | -1.23793200 | -0.00146000 | H                | 0.31014700  | 1.18889300  | -0.21089800 |
| C                | 2.79030300  | 0.09554100  | 0.00042200  | C                | 3.41741300  | 0.28327200  | -0.11084200 |
| F                | 3.28669800  | -0.52822500 | -1.09186200 | H                | 3.79013000  | 1.14144900  | -0.68602100 |
| F                | 3.21580500  | 1.36757400  | -0.00422000 | F                | 4.02335100  | -0.85641900 | -0.54638100 |
| F                | 3.28281000  | -0.51890800 | 1.10016700  | C                | -1.89272300 | -0.12779500 | -0.18694600 |
| C                | -2.53533800 | -0.26486300 | -0.00122700 | O                | -1.34094300 | 0.97137300  | -0.20245500 |
| O                | -1.79646700 | -1.25932600 | -0.00219000 | O                | -1.30390800 | -1.31380400 | -0.20531100 |
| O                | -2.13889400 | 0.99407500  | -0.00354200 | H                | -0.30949500 | -1.18737700 | -0.20219300 |
| H                | -1.14133700 | 1.01476400  | -0.00603800 | C                | -3.41701600 | -0.28272500 | -0.11338600 |
| C                | -4.03809400 | -0.46640700 | 0.00339600  | H                | -3.78757100 | -1.13837000 | -0.69373900 |
| H                | -4.30836800 | -1.03757400 | 0.90404500  | F                | -4.02151800 | 0.85882700  | -0.54592000 |
| H                | -4.31321300 | -1.04346400 | -0.89196000 | F                | 3.74163700  | 0.46639600  | 1.21574500  |
| F                | -4.73675800 | 0.73640500  | 0.00137500  | F                | -3.74591800 | -0.47187200 | 1.21121500  |
| <b>DFAA-TFAA</b> |             |             |             | <b>TFAA-TFAA</b> |             |             |             |
| C                | -1.59082900 | 0.02027000  | -0.00296100 | C                | -1.89006800 | -0.02837200 | 0.00038300  |
| O                | -0.91030900 | 1.04337000  | -0.00536200 | O                | -1.24956400 | -1.07715300 | 0.00079200  |
| O                | -1.17126300 | -1.22859300 | -0.00349400 | O                | -1.42338200 | 1.20381600  | 0.00032800  |
| H                | -0.16734700 | -1.23461300 | -0.00677800 | H                | -0.42291800 | 1.17435700  | 0.00080100  |
| C                | -3.13329600 | 0.08228400  | 0.00148100  | C                | 1.89005800  | 0.02864700  | 0.00049100  |
| F                | -3.56379800 | 1.35210600  | 0.00188300  | O                | 1.24986900  | 1.07762400  | 0.00098900  |
| F                | -3.61967400 | -0.53883400 | 1.09939300  | O                | 1.42303600  | -1.20340000 | 0.00048200  |
| F                | -3.62614500 | -0.54033200 | -1.09266100 | H                | 0.42251800  | -1.17365400 | 0.00088800  |
| C                | 2.19317100  | -0.22094800 | -0.00169000 | C                | -3.43382100 | -0.03123100 | -0.00031900 |
| O                | 1.48755200  | -1.23543300 | -0.00154600 | C                | 3.43381800  | 0.03105800  | -0.00020100 |
| O                | 1.78217800  | 1.03057500  | -0.00500800 | F                | -3.89753700 | 0.60901300  | -1.09646800 |
| H                | 0.78359900  | 1.05045000  | -0.00631800 | F                | -3.89845400 | 0.60864300  | 1.09567200  |

|   |            |             |             |   |             |             |             |
|---|------------|-------------|-------------|---|-------------|-------------|-------------|
| C | 3.71918900 | -0.34762300 | 0.00246200  | F | -3.91134400 | -1.28386700 | -0.00072800 |
| H | 4.03444600 | -1.39862200 | 0.00440100  | F | 3.91174200  | 1.28354500  | -0.00024400 |
| F | 4.21924400 | 0.28126900  | 1.11374300  | F | 3.89736300  | -0.60899200 | -1.09653900 |
| F | 4.22533000 | 0.27907400  | -1.10722100 | F | 3.89831900  | -0.60927800 | 1.09558000  |

**Cartesian coordinates of various hydrogen bonded carboxylic acid dimers considered in the present investigation at B3LYP-D3/aug-cc-pVDZ level of theory.**

|               |             |             |             |               |             |             |             |
|---------------|-------------|-------------|-------------|---------------|-------------|-------------|-------------|
| <b>FA-FA</b>  |             |             |             | <b>FA-AA</b>  |             |             |             |
| C             | -1.88953600 | -0.16900800 | -0.00019000 | C             | -1.40080900 | -0.06932400 | -0.00003800 |
| H             | -2.98919500 | -0.24375200 | 0.00004900  | O             | -0.69941000 | -1.08259600 | 0.00000700  |
| O             | -1.17584700 | -1.16591100 | -0.00014200 | O             | -0.91715100 | 1.16279000  | -0.00014200 |
| O             | -1.48107100 | 1.08030700  | -0.00004100 | H             | 0.08379500  | 1.15039700  | -0.00036700 |
| H             | -0.47644300 | 1.12392000  | -0.00004100 | C             | 2.41122300  | 0.09935000  | 0.00010900  |
| C             | 1.88941600  | 0.16907200  | -0.00009500 | H             | 3.51383700  | 0.11470300  | 0.00040900  |
| H             | 2.98907900  | 0.24390900  | -0.00000400 | O             | 1.75247100  | 1.13354900  | -0.00015400 |
| O             | 1.17566100  | 1.16592800  | 0.00007900  | O             | 1.93494000  | -1.12478100 | 0.00024600  |
| O             | 1.48108800  | -1.08028800 | -0.00028600 | H             | 0.92548900  | -1.11027900 | -0.00000500 |
| H             | 0.47653700  | -1.12414900 | -0.00026900 | C             | -2.90290900 | -0.11817400 | 0.00003900  |
| <b>FA-PA</b>  |             |             |             | <b>FA-MPA</b> |             |             |             |
| C             | -2.87077300 | -0.18012400 | 0.00010800  | C             | -3.19654100 | 0.05584500  | 0.09611400  |
| H             | -3.95953300 | -0.35459100 | 0.00021000  | H             | -4.29185300 | 0.13890000  | 0.19277600  |
| O             | -2.39937700 | 0.95154000  | 0.00013100  | O             | -2.65399100 | -1.00510100 | -0.19239500 |
| O             | -2.19108900 | -1.30453100 | -0.00008000 | O             | -2.59299800 | 1.20009400  | 0.32363000  |
| H             | -1.19873500 | -1.11666600 | -0.00018800 | H             | -1.59191600 | 1.09644700  | 0.22943200  |
| C             | 0.91676600  | 0.30122600  | 0.00018200  | C             | 0.60453600  | -0.10818600 | -0.20686300 |
| O             | 0.39501000  | -0.81514900 | -0.00028800 | O             | 0.01022000  | 0.93196800  | 0.08462400  |
| O             | 0.23154400  | 1.43473700  | 0.00047400  | O             | -0.00571700 | -1.25678100 | -0.45767900 |
| H             | -0.75212400 | 1.25450400  | 0.00030700  | H             | -0.99665700 | -1.16192800 | -0.35837500 |
| C             | 2.41089700  | 0.51279000  | 0.00040800  | C             | 2.11472800  | -0.20573100 | -0.26793000 |
| H             | 2.64401200  | 1.13806000  | -0.87444000 | H             | 2.34907300  | -0.90799000 | -1.08054600 |
| H             | 2.64383400  | 1.13725500  | 0.87587800  | C             | 2.61227700  | -0.82269500 | 1.05650500  |
| C             | 3.21855900  | -0.78222800 | -0.00010100 | C             | 2.75916700  | 1.15423800  | -0.54379300 |
| H             | 2.98960500  | -1.38815500 | -0.88577600 | H             | 3.85081700  | 1.04585300  | -0.59317200 |
| H             | 4.29301100  | -0.55754100 | 0.00009000  | H             | 2.40995100  | 1.57743600  | -1.49457900 |
| H             | 2.98945500  | -1.38894500 | 0.88499400  | H             | 2.51305300  | 1.86754100  | 0.25280000  |
| <b>FA-FFA</b> |             |             |             | <b>FA-FAA</b> |             |             |             |
| C             | 2.33944400  | 0.13655800  | -0.00004700 | C             | 2.83522100  | 0.27328200  | 0.00029300  |
| H             | 3.43833700  | 0.20646800  | 0.00024200  | H             | 3.92786600  | 0.41670100  | 0.00049000  |
| O             | 1.63171800  | 1.13898000  | -0.00012400 | O             | 2.06092500  | 1.22431700  | 0.00030500  |
| O             | 1.92413500  | -1.10956900 | 0.00003900  | O             | 2.50385000  | -0.99827800 | 0.00001200  |
| H             | 0.92476900  | -1.14855400 | -0.00011000 | H             | 1.50291200  | -1.10124800 | -0.00017700 |
| C             | -1.39144800 | -0.08272700 | 0.00017200  | C             | -0.91308700 | -0.27637600 | -0.00025200 |
| O             | -0.75636800 | -1.11645500 | 0.00012300  | O             | -0.13575100 | -1.23204500 | -0.00046600 |
| O             | -0.97389600 | 1.14768100  | -0.00021900 | O             | -0.57416300 | 0.98800000  | 0.00008100  |
| H             | 0.03831700  | 1.15925300  | -0.00034800 | H             | 0.42791600  | 1.08222200  | 0.00014700  |
| F             | -2.72854300 | -0.11849900 | -0.00008700 | C             | -2.40346600 | -0.55526000 | -0.00030600 |
|               |             |             |             | H             | -2.64343700 | -1.14686400 | -0.89551900 |
|               |             |             |             | H             | -2.64343700 | -1.14720300 | 0.89468500  |

|                |                |             |             |             |             |             |             |
|----------------|----------------|-------------|-------------|-------------|-------------|-------------|-------------|
|                | F              | -3.17257300 | 0.59872300  | -0.00008500 |             |             |             |
| <b>FA-DFAA</b> | <b>FA-TFAA</b> |             |             |             |             |             |             |
| C              | 3.15911400     | -0.00249400 | 0.08464800  | C           | 0.34154800  | 0.03852200  | -0.00020600 |
| H              | 4.25688500     | -0.03372900 | 0.16998400  | O           | -0.28825300 | 1.08377000  | 0.00004800  |
| O              | 2.56294900     | 1.03789700  | -0.17437800 | O           | -0.13111100 | -1.17873300 | -0.00027500 |
| O              | 2.61462100     | -1.18048500 | 0.29040600  | H           | -1.14366900 | -1.16556800 | -0.00024200 |
| H              | 1.61731800     | -1.12803600 | 0.20851700  | C           | -3.42836900 | -0.09997000 | 0.00008600  |
| C              | -0.61048500    | 0.07991200  | -0.17889200 | H           | -4.52883300 | -0.14171700 | 0.00014400  |
| O              | -0.04301600    | -0.97423200 | 0.06399700  | O           | -2.74496100 | -1.11849500 | -0.00006200 |
| O              | -0.04543300    | 1.24452400  | -0.40148600 | O           | -2.98186300 | 1.13651400  | 0.00012500  |
| H              | 0.95851900     | 1.17543500  | -0.31474900 | H           | -1.98290400 | 1.14973000  | 0.00005200  |
| C              | -2.14448800    | 0.19168300  | -0.23727000 | C           | 1.89392300  | 0.04246200  | -0.00002900 |
| H              | -2.48392600    | 0.91938100  | -0.98691700 | F           | 2.36156900  | -0.59474600 | -1.09442700 |
| F              | -2.57693100    | 0.60266800  | 1.00127100  | F           | 2.37182100  | 1.29294600  | 0.00039200  |
| F              | -2.69303300    | -1.02294700 | -0.49942100 | F           | 2.36134900  | -0.59541500 | 1.09407700  |
| <b>AA-AA</b>   | <b>AA-PA</b>   |             |             |             |             |             |             |
| C              | -1.91779900    | -0.06095600 | -0.00019700 | C           | 2.36866300  | -0.06694900 | 0.07647000  |
| O              | -1.23750200    | -1.08836200 | -0.00030200 | O           | 1.67676300  | -1.08571000 | 0.03449800  |
| O              | -1.40828200    | 1.15990800  | -0.00038500 | O           | 1.88130600  | 1.15907500  | -0.01929500 |
| H              | -0.40428500    | 1.12305200  | -0.00070700 | H           | 0.88204600  | 1.13537000  | -0.13037600 |
| C              | 1.91772300     | 0.06088200  | -0.00015200 | C           | 3.86259800  | -0.10301900 | 0.24266100  |
| O              | 1.23739400     | 1.08826500  | -0.00020400 | H           | 4.20420300  | -1.13815800 | 0.32278400  |
| O              | 1.40833100     | -1.16003300 | -0.00044200 | H           | 4.33623600  | 0.39056500  | -0.61652000 |
| H              | 0.40436500     | -1.12347600 | -0.00067900 | H           | 4.14366900  | 0.46397400  | 1.14013800  |
| C              | -3.42131100    | -0.07914900 | 0.00017500  | C           | -1.44042700 | 0.10940000  | -0.34875200 |
| H              | -3.79209200    | 0.45595600  | 0.88468800  | O           | -0.74480700 | 1.12663200  | -0.30784800 |
| H              | -3.79255400    | 0.45615000  | -0.88402400 | O           | -0.95278800 | -1.11838400 | -0.26777800 |
| H              | -3.78174100    | -1.11103400 | 0.00016900  | H           | 0.04514800  | -1.09673700 | -0.15494800 |
| C              | 3.42125800     | 0.07916900  | 0.00027500  | C           | -2.94353000 | 0.15490000  | -0.45410600 |
| H              | 3.79203900     | -0.45600400 | 0.88474400  | H           | -3.22212700 | 1.14485900  | -0.83179800 |
| H              | 3.79256300     | -0.45602300 | -0.88396100 | H           | -3.26604900 | -0.61069000 | -1.17238700 |
| H              | 3.78165600     | 1.11107000  | 0.00038200  | C           | -3.59535900 | -0.10699500 | 0.91637100  |
|                |                |             |             | H           | -4.68833800 | -0.05931000 | 0.82768700  |
|                |                |             |             | H           | -3.32116000 | -1.09966900 | 1.29525700  |
|                |                |             |             | H           | -3.27807600 | 0.64689200  | 1.64950400  |
| <b>AA-MPA</b>  | <b>AA-FFA</b>  |             |             |             |             |             |             |
| C              | 2.72921000     | 0.00021100  | 0.02973300  | C           | 1.85742600  | -0.05803500 | 0.00103500  |
| O              | 2.12989900     | -1.03799500 | -0.25448200 | O           | 1.14458000  | -1.06506300 | 0.00116400  |
| O              | 2.12942200     | 1.15403500  | 0.27331300  | O           | 1.38643700  | 1.17811000  | 0.00019000  |
| H              | 1.13156800     | 1.05756400  | 0.19373600  | H           | 0.39040200  | 1.17783100  | -0.00049600 |
| C              | 4.22747100     | 0.07438000  | 0.13292000  | C           | 3.35680000  | -0.12543500 | 0.00188500  |
| H              | 4.66470500     | -0.90573500 | -0.07394200 | H           | 3.68330800  | -1.16830100 | 0.00240700  |
| H              | 4.60501700     | 0.81978500  | -0.57978100 | H           | 3.74450800  | 0.39784400  | -0.88235200 |
| H              | 4.50744900     | 0.41417000  | 1.13896400  | H           | 3.74350800  | 0.39838300  | 0.88624400  |
| C              | -1.09999400    | -0.10503600 | -0.21116500 | C           | -1.89910500 | 0.06128300  | -0.00122000 |
| O              | -0.49400300    | 0.92911100  | 0.07674400  | O           | -1.30483300 | 1.11899300  | -0.00174200 |
| O              | -0.50172600    | -1.25569800 | -0.47673800 | O           | -1.43418600 | -1.15043600 | -0.00022800 |
| C              | -2.61228900    | -0.19102100 | -0.25001900 | H           | -0.41645700 | -1.11990300 | 0.00029200  |
| H              | 0.49446300     | -1.16478100 | -0.39074900 | F           | -3.23885900 | 0.04665000  | -0.00239300 |
| H              | -2.86458800    | -0.88876700 | -1.06116000 |             |             |             |             |
| C              | -3.09501800    | -0.80780300 | 1.07971900  |             |             |             |             |
| C              | -3.25029400    | 1.17470100  | -0.51206300 |             |             |             |             |
| H              | -4.18727100    | -0.91816600 | 1.06164700  |             |             |             |             |
| H              | -2.64868200    | -1.79605900 | 1.24571100  |             |             |             |             |
| H              | -2.83066000    | -0.15498800 | 1.92338500  |             |             |             |             |
| H              | -4.34355900    | 1.07584000  | -0.54394600 |             |             |             |             |
| H              | -2.98486300    | 1.88391700  | 0.28200500  |             |             |             |             |
| H              | -2.91280200    | 1.59747900  | -1.46730300 |             |             |             |             |



|                |             |             |             |                |             |             |             |
|----------------|-------------|-------------|-------------|----------------|-------------|-------------|-------------|
| <b>AA-FAA</b>  |             |             |             | <b>AA-DFAA</b> |             |             |             |
| C              | -2.35889500 | -0.12984800 | 0.00171500  | C              | 2.69543800  | -0.10706500 | -0.00016000 |
| O              | -1.58927000 | -1.09274700 | 0.00061100  | O              | 1.93482600  | -1.07725400 | -0.00136900 |
| O              | -1.95983100 | 1.13202000  | 0.00210900  | O              | 2.28329000  | 1.15147200  | 0.00108700  |
| H              | -0.95973200 | 1.18634400  | 0.00135000  | H              | 1.28675000  | 1.19577300  | 0.00119800  |
| C              | -3.85349300 | -0.28251000 | 0.00249200  | C              | 4.19059800  | -0.24455900 | -0.00055000 |
| H              | -4.12001600 | -1.34239800 | 0.00207200  | H              | 4.46751300  | -1.30171800 | -0.00308300 |
| H              | -4.26987500 | 0.21711700  | 0.88737600  | H              | 4.60227500  | 0.26215700  | -0.88361600 |
| H              | -4.27092000 | 0.21807400  | -0.88136000 | H              | 4.60208200  | 0.25770700  | 0.88516000  |
| C              | 1.42881900  | 0.27956800  | 0.00002300  | C              | -1.09360400 | 0.23066500  | 0.00058100  |
| O              | 0.69864500  | 1.27175400  | 0.00024200  | O              | -0.40530200 | 1.24749100  | 0.00196700  |
| O              | 1.02883000  | -0.96576100 | 0.00002100  | O              | -0.66746600 | -1.00268100 | -0.00123400 |
| H              | 0.01872900  | -1.00905300 | 0.00016100  | H              | 0.34692400  | -1.02964300 | -0.00143500 |
| C              | 2.93110900  | 0.48771900  | -0.00001900 | C              | -2.62526500 | 0.35591600  | 0.00087800  |
| H              | 3.19936600  | 1.06709400  | 0.89508200  | H              | -2.93159300 | 1.40957900  | 0.00309200  |
| H              | 3.19926500  | 1.06726200  | -0.89504100 | F              | -3.13622300 | -0.26690300 | 1.10753000  |
| F              | 3.64659800  | -0.70121700 | -0.00017000 | F              | -3.13609200 | -0.26218200 | -1.10850400 |
| <b>AA-TFAA</b> |             |             |             | <b>MPA-MPA</b> |             |             |             |
| C              | 0.80783000  | 0.05222400  | -0.00001000 | C              | -1.90622800 | -0.04989500 | -0.21901800 |
| O              | 0.20016200  | 1.11087000  | 0.00025600  | O              | -1.34349300 | 0.88555600  | 0.35334500  |
| O              | 0.30961400  | -1.15329500 | -0.00034100 | O              | -1.26411300 | -1.08269700 | -0.74171200 |
| H              | -0.70864000 | -1.11623000 | -0.00039100 | H              | -0.27462800 | -0.99958500 | -0.58751600 |
| C              | -2.98313700 | -0.05305000 | 0.00022200  | C              | -3.41248300 | -0.14906300 | -0.35214400 |
| O              | -2.27626600 | -1.06386200 | -0.00018100 | H              | -3.60963300 | -0.61160600 | -1.32976700 |
| O              | -2.50347900 | 1.18101200  | 0.00028100  | C              | -3.93243900 | -1.10420400 | 0.74283800  |
| H              | -1.50831200 | 1.17302100  | 0.00018400  | C              | -4.07931700 | 1.22576400  | -0.27562700 |
| C              | 2.35995200  | 0.02497600  | -0.00000300 | H              | -3.71447600 | 1.89226800  | -1.06794200 |
| C              | -4.48290800 | -0.10956700 | -0.00000600 | H              | -5.16682400 | 1.11972300  | -0.38548500 |
| H              | -4.86640500 | 0.41646900  | 0.88446000  | H              | -3.86890300 | 1.70406400  | 0.68923100  |
| H              | -4.86623900 | 0.41707100  | -0.88419000 | H              | -3.72276200 | -0.69387600 | 1.74059600  |
| H              | -4.81671400 | -1.15012000 | -0.00039300 | H              | -5.01929400 | -1.22443600 | 0.64385000  |
| F              | 2.81623000  | -0.62153700 | -1.09443400 | H              | -3.46463800 | -2.09324000 | 0.66342600  |
| F              | 2.81621600  | -0.62217500 | 1.09405500  | C              | 1.90631300  | 0.04928900  | 0.21951800  |
| F              | 2.86478200  | 1.26543500  | 0.00036200  | O              | 1.34355300  | -0.88613200 | -0.35286800 |
|                |             |             |             | O              | 1.26418500  | 1.08209100  | 0.74221400  |
|                |             |             |             | H              | 0.27467900  | 0.99893700  | 0.58804800  |
|                |             |             |             | C              | 3.41256200  | 0.14849400  | 0.35255400  |
|                |             |             |             | H              | 3.60974800  | 0.61103500  | 1.33017100  |
|                |             |             |             | C              | 4.07941200  | -1.22632600 | 0.27600300  |
|                |             |             |             | C              | 3.93244600  | 1.10364700  | -0.74244700 |
|                |             |             |             | H              | 5.16692500  | -1.12026300 | 0.38578000  |
|                |             |             |             | H              | 3.71463800  | -1.89282400 | 1.06835300  |
|                |             |             |             | H              | 3.86893300  | -1.70463600 | -0.68883600 |
|                |             |             |             | H              | 5.01930200  | 1.22390900  | -0.64350800 |
|                |             |             |             | H              | 3.72273500  | 0.69331800  | -1.74019800 |
|                |             |             |             | H              | 3.46462600  | 2.09267300  | -0.66301600 |
| <b>MPA-FFA</b> |             |             |             | <b>MPA-FAA</b> |             |             |             |
| C              | 2.69534200  | 0.00871600  | 0.03234900  | C              | 2.25577100  | 0.22685000  | 0.05524300  |
| O              | 2.19605100  | -1.06276000 | -0.24019700 | O              | 1.75689700  | -0.86055100 | -0.20187200 |
| O              | 2.12883700  | 1.15392100  | 0.25894900  | O              | 1.59286400  | 1.34920700  | 0.26064200  |
| H              | 1.11725300  | 1.05199500  | 0.17783100  | H              | 0.59692700  | 1.19344300  | 0.17788000  |
| F              | 4.02730000  | 0.11874600  | 0.13581200  | C              | 3.75140000  | 0.45146100  | 0.17981600  |
| C              | -1.05255600 | -0.13180200 | -0.21662100 | H              | 4.06698200  | 1.20085800  | -0.56081500 |
| O              | -0.42401500 | 0.89429000  | 0.05960400  | H              | 3.97739200  | 0.82805900  | 1.18818600  |
| O              | -0.47860900 | -1.29703100 | -0.47164200 | F              | 4.45274200  | -0.72280700 | -0.03450700 |
| H              | 0.51157600  | -1.23115000 | -0.39096700 | C              | -1.53352300 | -0.11412900 | -0.20736000 |
| C              | -2.56396900 | -0.18472900 | -0.24941800 | O              | -0.98240800 | 0.95790500  | 0.05492500  |
| H              | -2.83352700 | -0.89348200 | -1.04506300 | O              | -0.87638500 | -1.24000300 | -0.43725900 |

|                 |             |             |             |                 |             |             |             |
|-----------------|-------------|-------------|-------------|-----------------|-------------|-------------|-------------|
| C               | -3.05311800 | -0.76473900 | 1.09539200  | H               | 0.11018800  | -1.10082800 | -0.34968200 |
| C               | -3.17312000 | 1.18925000  | -0.53659500 | C               | -3.03834000 | -0.27692700 | -0.25166900 |
| H               | -4.14725800 | -0.85198100 | 1.08101500  | H               | -3.24919600 | -1.01009300 | -1.04307800 |
| H               | -2.62823200 | -1.75903000 | 1.28024000  | C               | -3.49762600 | -0.87860500 | 1.09354300  |
| H               | -2.77311100 | -0.10036000 | 1.92461600  | C               | -3.74242300 | 1.04665000  | -0.55729800 |
| H               | -4.26783000 | 1.11064600  | -0.56600600 | H               | -4.58269300 | -1.04414700 | 1.07228600  |
| H               | -2.89414200 | 1.90754600  | 0.24441000  | H               | -3.00377100 | -1.83806100 | 1.29069800  |
| H               | -2.82898100 | 1.58691900  | -1.50010800 | H               | -3.27243500 | -0.18906900 | 1.91908700  |
| <b>MPA-DFAA</b> |             |             |             | <b>MPA-TFAA</b> |             |             |             |
| C               | -1.91270800 | -0.01397300 | -0.21228300 | C               | -1.59809400 | 0.03981100  | -0.00453500 |
| O               | -1.28442700 | 0.89841800  | 0.30355200  | O               | -0.94664300 | 1.04890300  | 0.21440100  |
| O               | -1.41570800 | -1.06963200 | -0.81134400 | O               | -1.15133500 | -1.15373000 | -0.27922600 |
| H               | -0.39854100 | -1.05882800 | -0.76972100 | H               | -0.12972600 | -1.15815500 | -0.29368600 |
| C               | -3.45109800 | -0.05495700 | -0.20492900 | C               | -3.14942400 | 0.07361000  | 0.02379500  |
| H               | -3.86360600 | -0.51988200 | -1.11054600 | F               | -3.61854900 | -0.77724100 | 0.96218700  |
| F               | -3.95478300 | 1.20016000  | -0.06811500 | F               | -3.60152100 | 1.30303000  | 0.30358800  |
| F               | -3.84235200 | -0.79649000 | 0.88552800  | F               | -3.64779300 | -0.30185300 | -1.17410400 |
| C               | 1.88236300  | -0.18212500 | -0.19113700 | C               | 2.18213300  | -0.22350700 | -0.10684900 |
| O               | 1.17456000  | -1.05039200 | -0.71070300 | O               | 1.42727400  | -1.17798300 | -0.31675300 |
| O               | 1.39863600  | 0.90258100  | 0.39294700  | O               | 1.75465300  | 0.99925500  | 0.16860300  |
| H               | 0.40167200  | 0.91098400  | 0.36078300  | H               | 0.76045400  | 1.03275200  | 0.18770400  |
| C               | 3.39111800  | -0.28638500 | -0.14612100 | C               | 3.68796000  | -0.36254700 | -0.11875500 |
| H               | 3.64207000  | -1.14381800 | -0.78292800 | H               | 3.88259500  | -1.37730100 | -0.48741400 |
| C               | 3.83862700  | -0.58480800 | 1.29781000  | C               | 4.33920200  | 0.66403800  | -1.05904600 |
| C               | 4.06023700  | 0.98217400  | -0.69777900 | C               | 4.22435900  | -0.23837300 | 1.32043900  |
| H               | 5.15038600  | 0.85020700  | -0.70306300 | H               | 5.42421200  | 0.49798400  | -1.08840200 |
| H               | 3.73654400  | 1.19152800  | -1.72625600 | H               | 3.95194100  | 0.57284700  | -2.08274900 |
| H               | 3.81698900  | 1.85184800  | -0.07481900 | H               | 4.15214600  | 1.68637000  | -0.70771400 |
| H               | 4.92751500  | -0.72389000 | 1.32359700  | H               | 5.30999700  | -0.40234800 | 1.32236700  |
| H               | 3.57895800  | 0.24909500  | 1.96267600  | H               | 4.02342900  | 0.76290300  | 1.72273300  |
| H               | 3.36778200  | -1.49945900 | 1.68229300  | H               | 3.76511300  | -0.98226200 | 1.98513000  |
| <b>FFA-FFA</b>  |             |             |             | <b>FFA-FAA</b>  |             |             |             |
| C               | 1.84397400  | -0.06594600 | -0.00007100 | C               | -1.37526400 | 0.26242900  | 0.00091300  |
| O               | 1.20130800  | -1.09596800 | -0.00075000 | O               | -0.61210400 | 1.23086300  | 0.00188100  |
| O               | 1.43243300  | 1.16775400  | 0.00002100  | O               | -1.01626800 | -0.99611900 | -0.00229000 |
| H               | 0.42882700  | 1.18329000  | -0.00031500 | H               | -0.01881300 | -1.07491000 | -0.00380000 |
| F               | 3.17602300  | -0.10959000 | -0.00011600 | C               | -2.86847200 | 0.51796700  | 0.00292300  |
| C               | -1.84404000 | 0.06584500  | -0.00009800 | H               | -3.11623200 | 1.10383800  | 0.89987400  |
| O               | -1.20149600 | 1.09594700  | -0.00068500 | H               | -3.11792200 | 1.10860400  | -0.89042500 |
| O               | -1.43251500 | -1.16784800 | -0.00008200 | F               | -3.61586400 | -0.64850300 | 0.00054500  |
| H               | -0.42891100 | -1.18362900 | -0.00040300 | C               | 2.33774500  | -0.13047500 | -0.00378600 |
| F               | -3.17612400 | 0.10944400  | -0.00013900 | O               | 1.65011700  | -1.13022300 | -0.00647600 |
| <b>FFA-DFAA</b> |             |             |             | <b>FFA-TFAA</b> |             |             |             |
| C               | -1.05446400 | -0.10029100 | -0.18604400 | C               | -0.76775700 | 0.02186500  | -0.00033200 |
| O               | -0.45866200 | 0.94164100  | 0.04570900  | O               | -0.12639600 | 1.06097100  | -0.00208300 |
| O               | -0.51944300 | -1.27840900 | -0.41109200 | O               | -0.30682400 | -1.20025300 | 0.00098900  |
| H               | 0.48023200  | -1.23256600 | -0.33957200 | H               | 0.69833200  | -1.19688800 | 0.00057700  |
| C               | -2.59102000 | -0.17428000 | -0.22330900 | C               | -2.31940700 | 0.04250600  | 0.00017700  |
| H               | -2.95775400 | -0.89581900 | -0.96600100 | F               | -2.78133900 | 1.29798500  | -0.00284000 |
| F               | -3.11010100 | 1.05274400  | -0.48199000 | F               | -2.78981300 | -0.58736400 | 1.09641200  |
| F               | -3.01258600 | -0.57059600 | 1.02253300  | F               | -2.79089200 | -0.59303300 | -1.09229500 |
| C               | 2.66464200  | -0.00827300 | 0.03190000  | C               | 2.95240800  | -0.05197600 | -0.00045800 |

|                  |             |             |             |                  |             |             |             |
|------------------|-------------|-------------|-------------|------------------|-------------|-------------|-------------|
| O                | 2.11551700  | -1.06299600 | -0.21211100 | O                | 2.33192500  | -1.09524300 | 0.00013000  |
| O                | 2.14865800  | 1.16698500  | 0.23806000  | O                | 2.51384500  | 1.17311600  | -0.00141700 |
| H                | 1.14524000  | 1.10933500  | 0.16875500  | H                | 1.51020100  | 1.16748000  | -0.00181100 |
| F                | 3.99519200  | 0.04773500  | 0.11943700  | F                | 4.28518600  | -0.06590000 | 0.00057500  |
| <b>FAA-FAA</b>   |             |             |             | <b>FAA-DFAA</b>  |             |             |             |
| C                | 1.87953000  | -0.24211400 | 0.00254900  | C                | 2.22881500  | 0.23820800  | 0.03666100  |
| O                | 1.39315000  | 0.88158200  | -0.00168200 | O                | 1.69332900  | -0.83782700 | -0.19784900 |
| O                | 1.20226600  | -1.37510600 | 0.00519900  | O                | 1.60253000  | 1.38493200  | 0.22798200  |
| H                | 0.21254100  | -1.19750600 | 0.00333000  | H                | 0.61068000  | 1.26311400  | 0.15691400  |
| C                | 3.37362000  | -0.50387500 | 0.00502300  | C                | 3.73071000  | 0.41567400  | 0.14464700  |
| H                | 3.63649400  | -1.08403400 | 0.90179800  | H                | 4.06239100  | 1.14636200  | -0.60768000 |
| H                | 3.63869900  | -1.08778600 | -0.88868500 | H                | 3.97684900  | 0.79739400  | 1.14649700  |
| F                | 4.08655400  | 0.68154700  | 0.00337700  | F                | 4.38798500  | -0.78316700 | -0.06177700 |
| C                | -1.87872200 | 0.24254300  | 0.00045600  | C                | -1.52876200 | -0.08473200 | -0.18137300 |
| O                | -1.39197700 | -0.88100000 | 0.00109200  | O                | -1.02453800 | 1.00734700  | 0.03437700  |
| O                | -1.20180400 | 1.37576000  | -0.00078900 | O                | -0.89566300 | -1.21605700 | -0.38803400 |
| H                | -0.21217400 | 1.19839500  | -0.00122900 | H                | 0.10303100  | -1.08382800 | -0.31575900 |
| C                | -3.37287400 | 0.50386200  | 0.00116200  | C                | -3.05346600 | -0.28987100 | -0.21670400 |
| H                | -3.63649500 | 1.08597900  | 0.89647000  | H                | -3.35649200 | -1.06707200 | -0.93126000 |
| H                | -3.63753400 | 1.08567400  | -0.89402000 | F                | -3.44787900 | -0.67262300 | 1.04329700  |
| F                | -4.08541500 | -0.68177900 | 0.00180300  | F                | -3.67568400 | 0.87859700  | -0.52214600 |
| <b>FAA-TFAA</b>  |             |             |             | <b>DFAA-DFAA</b> |             |             |             |
| C                | 1.23368500  | 0.02255400  | -0.00041700 | C                | 1.87931100  | 0.13000100  | -0.18249300 |
| O                | 0.55914800  | 1.03982200  | -0.00324100 | O                | 1.33389900  | -0.96356000 | -0.19870800 |
| O                | 0.81267400  | -1.21314100 | 0.00238800  | O                | 1.28897000  | 1.30317600  | -0.19973500 |
| H                | -0.20058900 | -1.24025400 | 0.00206500  | H                | 0.28872400  | 1.19748300  | -0.19796800 |
| C                | 2.78415400  | 0.09388800  | -0.00059800 | C                | 3.40906100  | 0.28096700  | -0.11157200 |
| F                | 3.27822500  | -0.52561100 | -1.09364600 | H                | 3.76857700  | 1.17056900  | -0.64617200 |
| F                | 3.20731100  | 1.36370600  | -0.00348800 | F                | 4.01025300  | -0.82840800 | -0.61381100 |
| F                | 3.27831800  | -0.52063900 | 1.09517800  | C                | -1.87886800 | -0.12927100 | -0.18370100 |
| C                | -2.52436400 | -0.25984700 | 0.00075600  | O                | -1.33344000 | 0.96430900  | -0.19795300 |
| O                | -1.79292800 | -1.25187300 | 0.00271400  | O                | -1.28851600 | -1.30241700 | -0.20269100 |
| O                | -2.12357400 | 0.98707200  | -0.00239100 | H                | -0.28826700 | -1.19672700 | -0.20022900 |
| H                | -1.12518500 | 1.03190400  | -0.00304000 | C                | -3.40864300 | -0.28036900 | -0.11363500 |
| C                | -4.02565700 | -0.46491400 | 0.00177100  | H                | -3.76796800 | -1.16888800 | -0.65016300 |
| H                | -4.29335100 | -1.04247600 | 0.89845100  | F                | -4.00967600 | 0.83001200  | -0.61382100 |
| H                | -4.29397700 | -1.04702600 | -0.89177100 | F                | 3.74955900  | 0.39565500  | 1.21454500  |
| F                | -4.73283200 | 0.72598800  | -0.00100400 | F                | -3.74960300 | -0.39777100 | 1.21213000  |
| <b>DFAA-TFAA</b> |             |             |             | <b>TFAA-TFAA</b> |             |             |             |
| C                | -1.57709500 | 0.01770700  | -0.00079600 | C                | -1.87761200 | -0.02702900 | -0.00020400 |
| O                | -0.90551600 | 1.03661700  | -0.00170700 | O                | -1.24546500 | -1.07124700 | -0.00008400 |
| O                | -1.15080500 | -1.21779300 | -0.00005400 | O                | -1.40455300 | 1.19152500  | -0.00002200 |
| H                | -0.14347700 | -1.24153800 | -0.00023700 | H                | -0.40044900 | 1.17781500  | 0.00001200  |
| C                | -3.12762700 | 0.08225500  | -0.00096300 | C                | 1.87751300  | 0.02711800  | 0.00017500  |
| F                | -3.55463100 | 1.35020800  | -0.00280600 | O                | 1.24533900  | 1.07132300  | 0.00032800  |
| F                | -3.61725900 | -0.53544600 | 1.09442100  | O                | 1.40463400  | -1.19149500 | -0.00010900 |
| F                | -3.61733000 | -0.53866800 | -1.09447600 | H                | 0.40057300  | -1.17807900 | -0.00018700 |
| C                | 2.18137200  | -0.21447700 | -0.00035100 | C                | -3.42968200 | -0.03224100 | 0.00013000  |
| O                | 1.48551800  | -1.22622400 | -0.00004800 | C                | 3.42959700  | 0.03242400  | 0.00028800  |
| O                | 1.76199700  | 1.02363400  | -0.00130400 | F                | -3.89442000 | 0.60497300  | -1.09427700 |
| H                | 0.76099500  | 1.05851700  | -0.00164100 | F                | -3.89399300 | 0.60545300  | 1.09444500  |
| C                | 3.71235500  | -0.34604400 | -0.00000300 | F                | -3.90363100 | -1.28311600 | 0.00048400  |
| H                | 4.01392800  | -1.40106500 | 0.00036800  | F                | 3.90346300  | 1.28333100  | 0.00073100  |
| F                | 4.21953500  | 0.27365500  | 1.10798700  | F                | 3.89422200  | -0.60463600 | -1.09426300 |
| F                | 4.22008900  | 0.27306400  | -1.10806400 | F                | 3.89409700  | -0.60536300 | 1.09446100  |
